# Supplementary material for: Nine new dihydro-β-agarofuran sesquiterpene polyesters from the leaves of Tripterygium wilfordii
Source: Royal Society of Chemistry journal article supplement (doi:10.1039/d1nj03800a), 2022-01-01
Supplement: d1nj03800a1.pdf [file d1nj03800a1.pdf]

*\*Supporting Info*

**Nine New Dihydro- $\beta$ -agarofuran Sesquiterpene Polyesters  
from the Leaves of *Tripterygium wilfordii***

Le Zhou,<sup>1, a</sup> Ming Bai,<sup>1, a</sup> Qing-Jun He,<sup>a</sup> Zi-Lin Hou,<sup>a</sup> Li-Wei Lu,<sup>a</sup> Jie Wang,<sup>a</sup> Xiao-  
Xiao Huang,<sup>a</sup> Bin Lin,<sup>\*, b</sup> and Shao-Jiang Song<sup>\*, a</sup>

<sup>a</sup> *Key Laboratory of Computational Chemistry-Based Natural Antitumor Drug Research & Development, Liaoning Province; Key Laboratory of Natural Bioactive Compounds Discovery & Modification, Shenyang City; School of Traditional Chinese Materia Medica, Shenyang Pharmaceutical University, Shenyang 110016, China*

<sup>b</sup>*School of Pharmaceutical Engineering, Liaoning Province, Shenyang Pharmaceutical University, Shenyang 110016, People's Republic of China*

<sup>1</sup> Le Zhou and Ming Bai contributed equally to this work.

\*Corresponding authors.

Tel: +86-24-43520707. E-mail: songsj99@163.com. (S.-J. Song)

Tel: +86-24-43520227. E-mail: randybinlin@gmail.com. (B. Lin)

## List of Contents

|                                                                                                         |    |
|---------------------------------------------------------------------------------------------------------|----|
| <b>Figure S1</b> Key HMBC correlations of compounds <b>2-9</b> .....                                    | 1  |
| <b>Figure S2</b> Key NOESY correlations of compounds <b>2-9</b> .....                                   | 2  |
| <b>Figure S3</b> UV spectrum of compound <b>1</b> .....                                                 | 3  |
| <b>Figure S4</b> IR spectrum of compound <b>1</b> .....                                                 | 3  |
| <b>Figure S5</b> HRESIMS spectrum of compound <b>1</b> .....                                            | 4  |
| <b>Figure S6</b> <sup>1</sup> H NMR spectrum (400 MHz, CDCl <sub>3</sub> ) of compound <b>1</b> .....   | 4  |
| <b>Figure S7</b> <sup>13</sup> C NMR spectrum (100 MHz, CDCl <sub>3</sub> ) of compound <b>1</b> .....  | 5  |
| <b>Figure S8</b> HSQC spectrum (600 MHz, CDCl <sub>3</sub> ) of compound <b>1</b> .....                 | 5  |
| <b>Figure S9</b> HMBC spectrum (600 MHz, CDCl <sub>3</sub> ) of compound <b>1</b> .....                 | 6  |
| <b>Figure S10</b> NOESY spectrum (600 MHz, CDCl <sub>3</sub> ) of compound <b>1</b> .....               | 6  |
| <b>Figure S11</b> Experimental ECD spectrum of compound <b>1</b> .....                                  | 7  |
| <b>Figure S12</b> UV spectrum of compound <b>2</b> .....                                                | 7  |
| <b>Figure S13</b> HRESIMS spectrum of compound <b>2</b> .....                                           | 8  |
| <b>Figure S14</b> <sup>1</sup> H NMR spectrum (400 MHz, CDCl <sub>3</sub> ) of compound <b>2</b> .....  | 8  |
| <b>Figure S15</b> <sup>13</sup> C NMR spectrum (100 MHz, CDCl <sub>3</sub> ) of compound <b>2</b> ..... | 9  |
| <b>Figure S16</b> HSQC spectrum (600 MHz, CDCl <sub>3</sub> ) of compound <b>2</b> .....                | 9  |
| <b>Figure S17</b> HMBC spectrum (600 MHz, CDCl <sub>3</sub> ) of compound <b>2</b> .....                | 10 |
| <b>Figure S18</b> NOESY spectrum (600 MHz, CDCl <sub>3</sub> ) of compound <b>2</b> .....               | 10 |
| <b>Figure S19</b> Experimental ECD spectrum of compound <b>2</b> .....                                  | 11 |
| <b>Figure S20</b> UV spectrum of compound <b>3</b> .....                                                | 11 |
| <b>Figure S21</b> IR spectrum of compound <b>3</b> .....                                                | 12 |
| <b>Figure S22</b> HRESIMS spectrum of compound <b>3</b> .....                                           | 12 |
| <b>Figure S23</b> <sup>1</sup> H NMR spectrum (400 MHz, CDCl <sub>3</sub> ) of compound <b>3</b> .....  | 13 |
| <b>Figure S24</b> <sup>13</sup> C NMR spectrum (100 MHz, CDCl <sub>3</sub> ) of compound <b>3</b> ..... | 13 |
| <b>Figure S25</b> HSQC spectrum (600 MHz, CDCl <sub>3</sub> ) of compound <b>3</b> .....                | 14 |
| <b>Figure S26</b> HMBC spectrum (600 MHz, CDCl <sub>3</sub> ) of compound <b>3</b> .....                | 14 |
| <b>Figure S27</b> NOESY spectrum (600 MHz, CDCl <sub>3</sub> ) of compound <b>3</b> .....               | 15 |
| <b>Figure S28</b> Experimental ECD spectrum of compound <b>3</b> .....                                  | 15 |
| <b>Figure S29</b> UV spectrum of compound <b>4</b> .....                                                | 16 |
| <b>Figure S30</b> IR spectrum of compound <b>4</b> .....                                                | 16 |

|                                                                                                         |    |
|---------------------------------------------------------------------------------------------------------|----|
| <b>Figure S31</b> HRESIMS spectrum of compound <b>4</b> .....                                           | 17 |
| <b>Figure S32</b> <sup>1</sup> H NMR spectrum (400 MHz, CDCl <sub>3</sub> ) of compound <b>4</b> .....  | 17 |
| <b>Figure S33</b> <sup>13</sup> C NMR spectrum (100 MHz, CDCl <sub>3</sub> ) of compound <b>4</b> ..... | 18 |
| <b>Figure S34</b> HSQC spectrum (600 MHz, CDCl <sub>3</sub> ) of compound <b>4</b> .....                | 18 |
| <b>Figure S35</b> HMBC spectrum (600 MHz, CDCl <sub>3</sub> ) of compound <b>4</b> .....                | 19 |
| <b>Figure S36</b> NOESY spectrum (600 MHz, CDCl <sub>3</sub> ) of compound <b>4</b> .....               | 19 |
| <b>Figure S37</b> Experimental ECD spectrum of compound <b>4</b> .....                                  | 20 |
| <b>Figure S38</b> UV spectrum of compound <b>5</b> .....                                                | 20 |
| <b>Figure S39</b> IR spectrum of compound <b>5</b> .....                                                | 21 |
| <b>Figure S40</b> HRESIMS spectrum of compound <b>5</b> .....                                           | 21 |
| <b>Figure S41</b> <sup>1</sup> H NMR spectrum (400 MHz, CDCl <sub>3</sub> ) of compound <b>5</b> .....  | 22 |
| <b>Figure S42</b> <sup>13</sup> C NMR spectrum (100 MHz, CDCl <sub>3</sub> ) of compound <b>5</b> ..... | 22 |
| <b>Figure S43</b> HSQC spectrum (600 MHz, CDCl <sub>3</sub> ) of compound <b>5</b> .....                | 23 |
| <b>Figure S44</b> HMBC spectrum (600 MHz, CDCl <sub>3</sub> ) of compound <b>5</b> .....                | 23 |
| <b>Figure S45</b> NOESY spectrum (600 MHz, CDCl <sub>3</sub> ) of compound <b>5</b> .....               | 24 |
| <b>Figure S46</b> Experimental ECD spectrum of compound <b>5</b> .....                                  | 24 |
| <b>Figure S47</b> UV spectrum of compound <b>6</b> .....                                                | 25 |
| <b>Figure S48</b> HRESIMS spectrum of compound <b>6</b> .....                                           | 25 |
| <b>Figure S49</b> <sup>1</sup> H NMR spectrum (400 MHz, CDCl <sub>3</sub> ) of compound <b>6</b> .....  | 26 |
| <b>Figure S50</b> <sup>13</sup> C NMR spectrum (100 MHz, CDCl <sub>3</sub> ) of compound <b>6</b> ..... | 26 |
| <b>Figure S51</b> HSQC spectrum (600 MHz, CDCl <sub>3</sub> ) of compound <b>6</b> .....                | 27 |
| <b>Figure S52</b> HMBC spectrum (600 MHz, CDCl <sub>3</sub> ) of compound <b>6</b> .....                | 27 |
| <b>Figure S53</b> NOESY spectrum (600 MHz, CDCl <sub>3</sub> ) of compound <b>6</b> .....               | 28 |
| <b>Figure S54</b> Experimental ECD spectrum of compound <b>6</b> .....                                  | 28 |
| <b>Figure S55</b> UV spectrum of compound <b>7</b> .....                                                | 29 |
| <b>Figure S56</b> HRESIMS spectrum of compound <b>7</b> .....                                           | 29 |
| <b>Figure S57</b> <sup>1</sup> H NMR spectrum (400 MHz, CDCl <sub>3</sub> ) of compound <b>7</b> .....  | 30 |
| <b>Figure S58</b> <sup>13</sup> C NMR spectrum (100 MHz, CDCl <sub>3</sub> ) of compound <b>7</b> ..... | 30 |
| <b>Figure S59</b> HSQC spectrum (600 MHz, CDCl <sub>3</sub> ) of compound <b>7</b> .....                | 31 |
| <b>Figure S60</b> HMBC spectrum (600 MHz, CDCl <sub>3</sub> ) of compound <b>7</b> .....                | 31 |
| <b>Figure S61</b> NOESY spectrum (600 MHz, CDCl <sub>3</sub> ) of compound <b>7</b> .....               | 32 |
| <b>Figure S62</b> Experimental ECD spectrum of compound <b>7</b> .....                                  | 32 |

|                                                                                                         |    |
|---------------------------------------------------------------------------------------------------------|----|
| <b>Figure S63</b> UV spectrum of compound <b>8</b> .....                                                | 33 |
| <b>Figure S64</b> HRESIMS spectrum of compound <b>8</b> .....                                           | 33 |
| <b>Figure S65</b> <sup>1</sup> H NMR spectrum (400 MHz, CDCl <sub>3</sub> ) of compound <b>8</b> .....  | 34 |
| <b>Figure S66</b> <sup>13</sup> C NMR spectrum (100 MHz, CDCl <sub>3</sub> ) of compound <b>8</b> ..... | 34 |
| <b>Figure S67</b> HSQC spectrum (600 MHz, CDCl <sub>3</sub> ) of compound <b>8</b> .....                | 35 |
| <b>Figure S68</b> HMBC spectrum (600 MHz, CDCl <sub>3</sub> ) of compound <b>8</b> .....                | 35 |
| <b>Figure S69</b> NOESY spectrum (600 MHz, CDCl <sub>3</sub> ) of compound <b>8</b> .....               | 36 |
| <b>Figure S70</b> Experimental ECD spectrum of compound <b>8</b> .....                                  | 36 |
| <b>Figure S71</b> UV spectrum of compound <b>9</b> .....                                                | 37 |
| <b>Figure S72</b> HRESIMS spectrum of compound <b>9</b> .....                                           | 37 |
| <b>Figure S73</b> <sup>1</sup> H NMR spectrum (400 MHz, CDCl <sub>3</sub> ) of compound <b>9</b> .....  | 38 |
| <b>Figure S74</b> <sup>13</sup> C NMR spectrum (100 MHz, CDCl <sub>3</sub> ) of compound <b>9</b> ..... | 38 |
| <b>Figure S75</b> HSQC spectrum (600 MHz, CDCl <sub>3</sub> ) of compound <b>9</b> .....                | 39 |
| <b>Figure S76</b> HMBC spectrum (600 MHz, CDCl <sub>3</sub> ) of compound <b>9</b> .....                | 39 |
| <b>Figure S77</b> NOESY spectrum (600 MHz, CDCl <sub>3</sub> ) of compound <b>9</b> .....               | 40 |
| <b>Figure S78</b> Experimental ECD spectrum of compound <b>9</b> .....                                  | 40 |

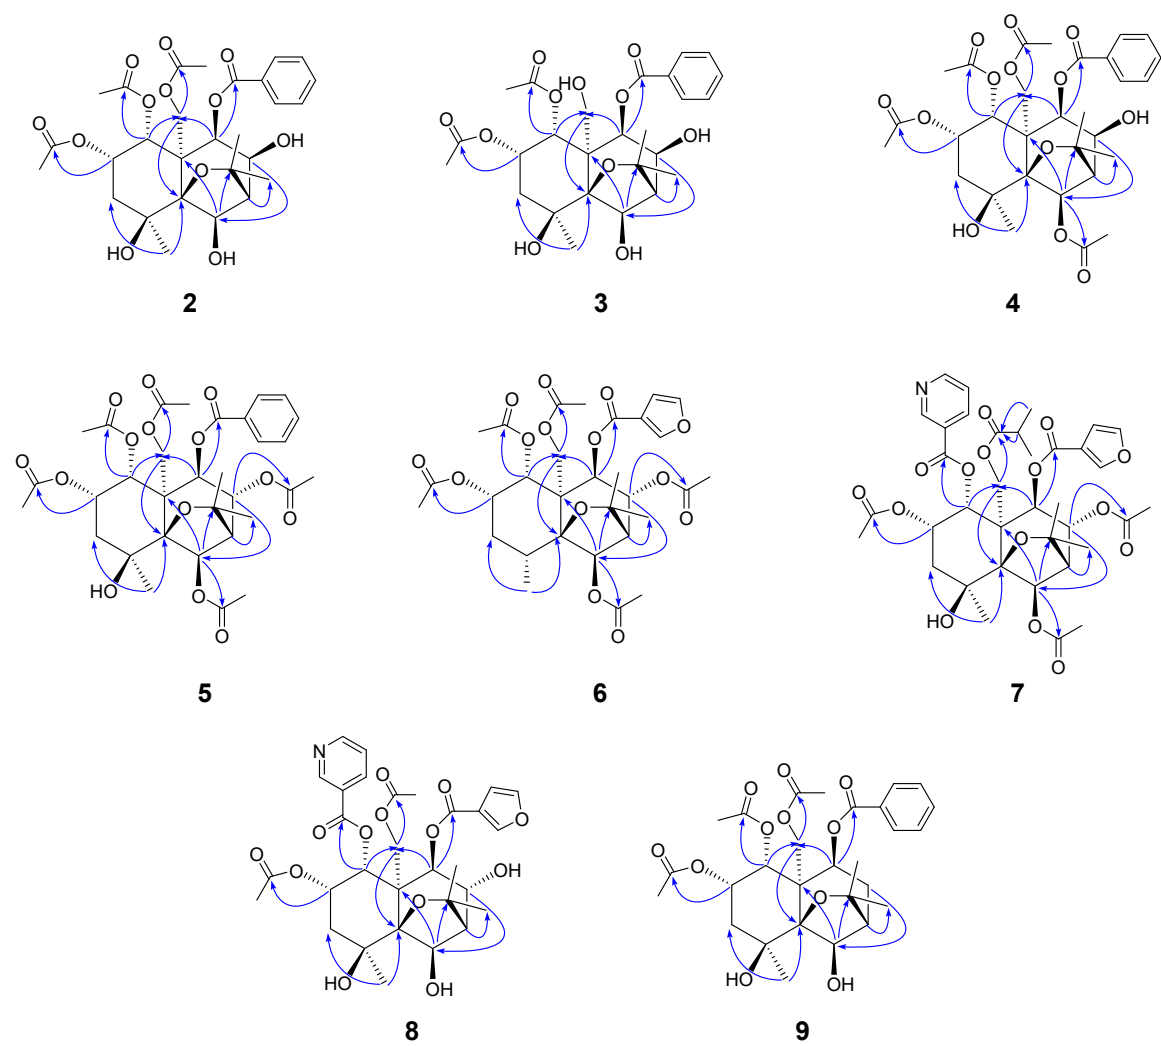

**Figure S1** Key HMBC correlations of compounds **2-9**.

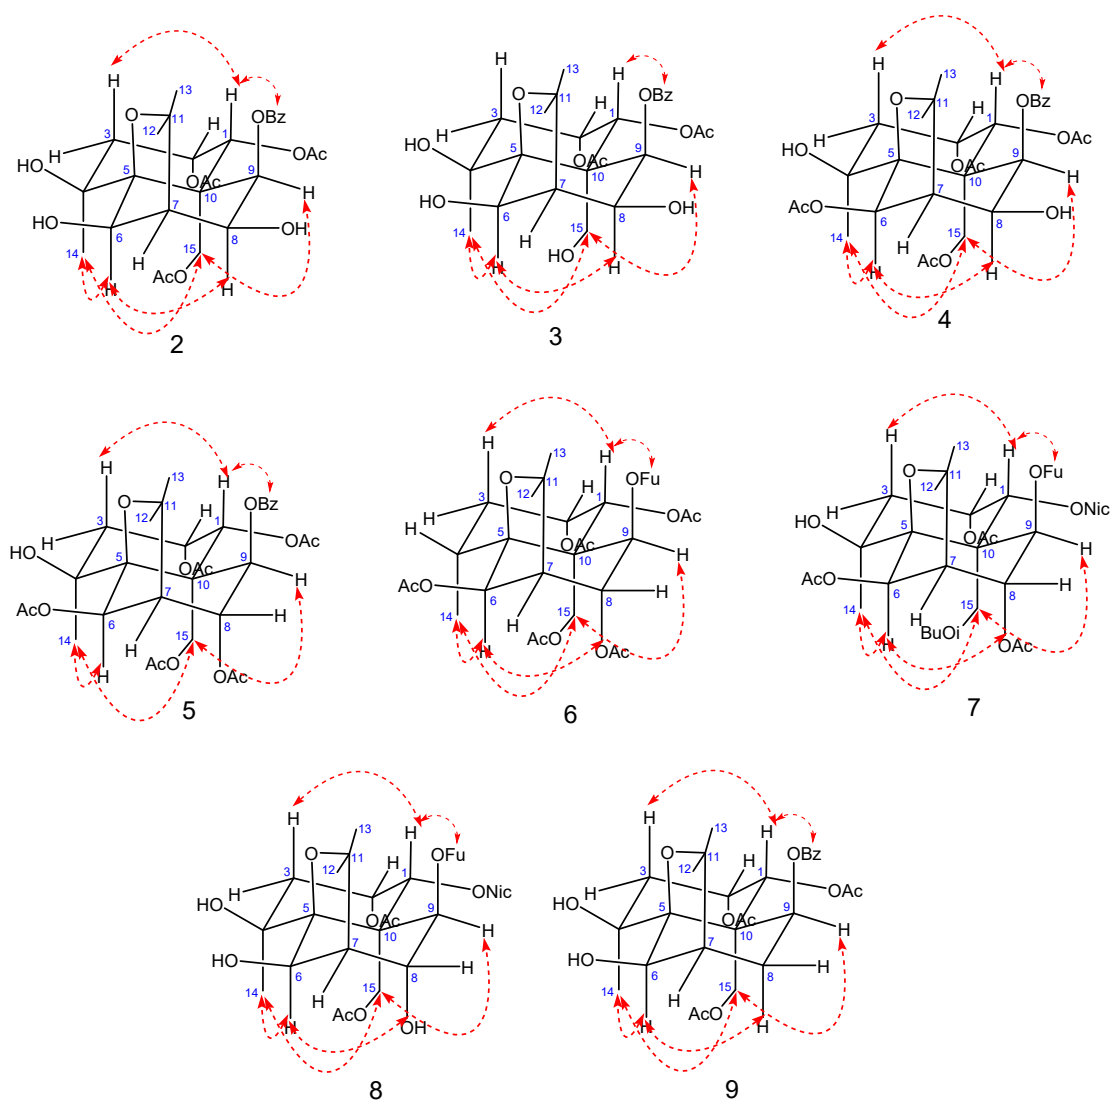

**Figure S2** Key NOESY correlations of compounds **2-9**.

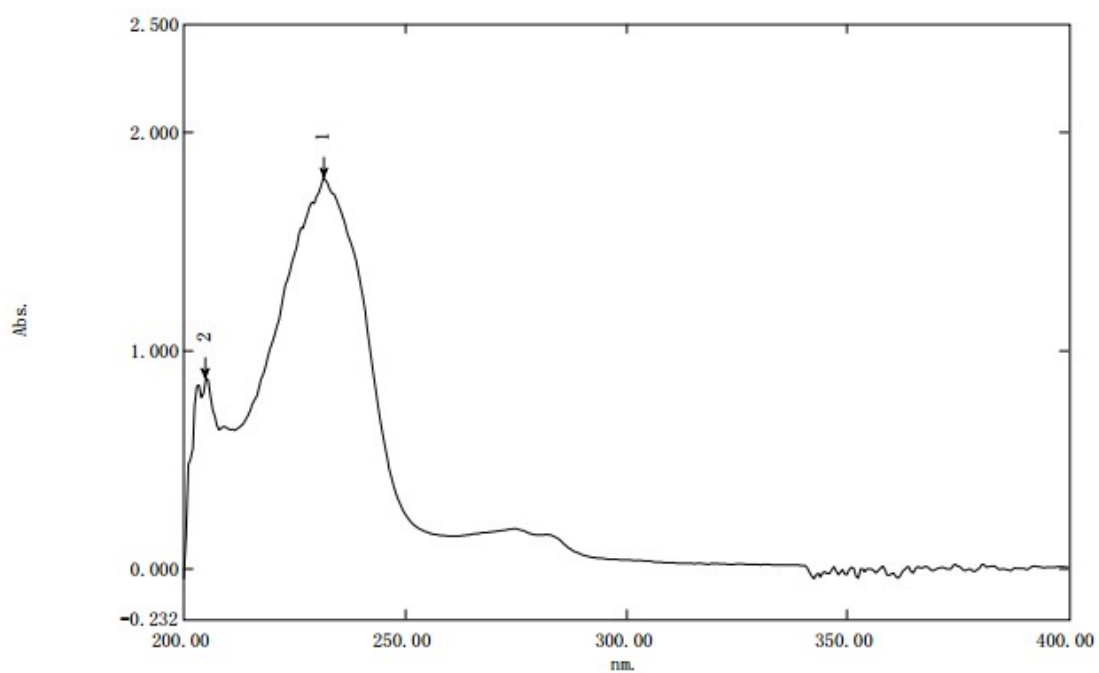

**Figure S3** UV spectrum of compound **1**

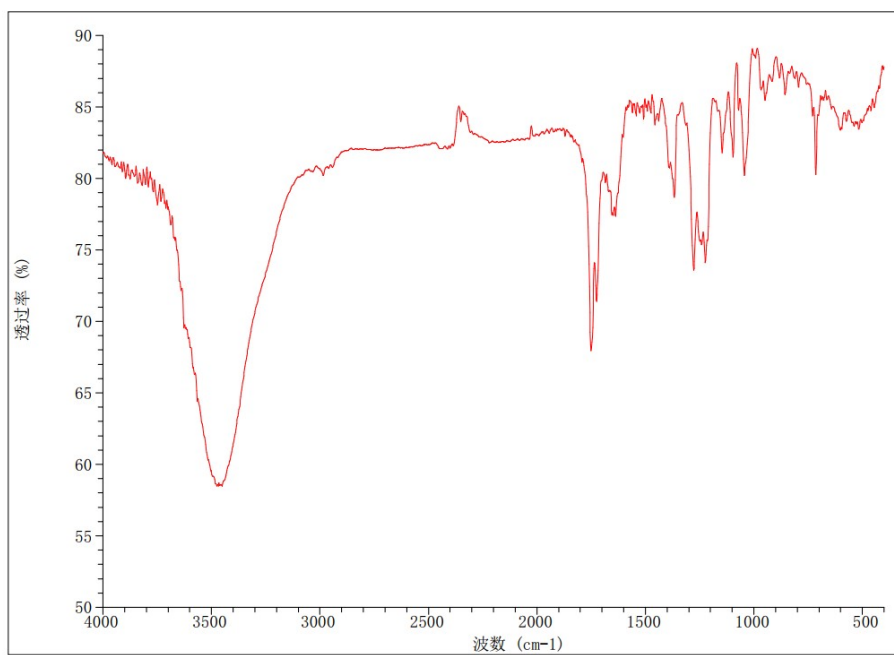

**Figure S4** IR spectrum of compound **1**

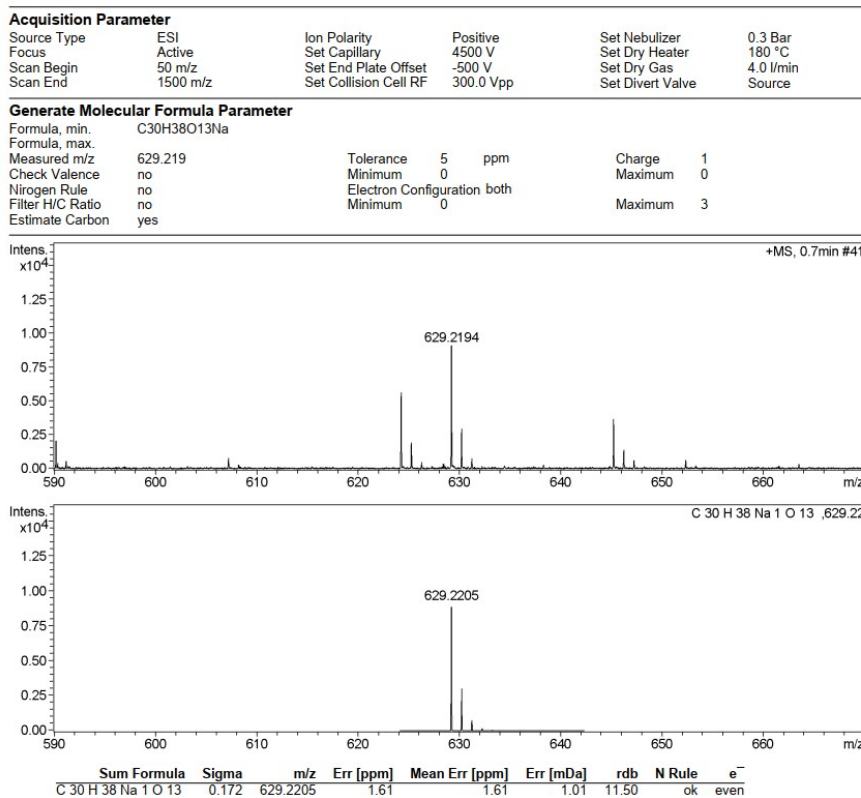

Figure S5 HRESIMS spectrum of compound 1

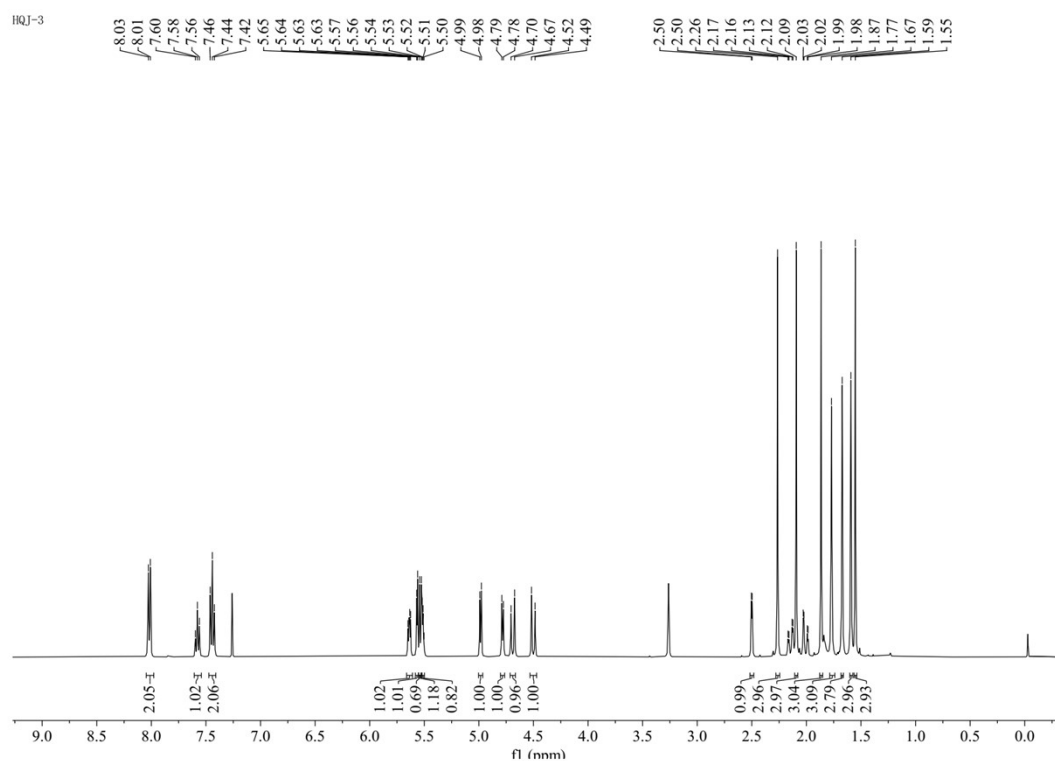

Figure S6 <sup>1</sup>H NMR spectrum (400 MHz, CDCl<sub>3</sub>) of compound 1



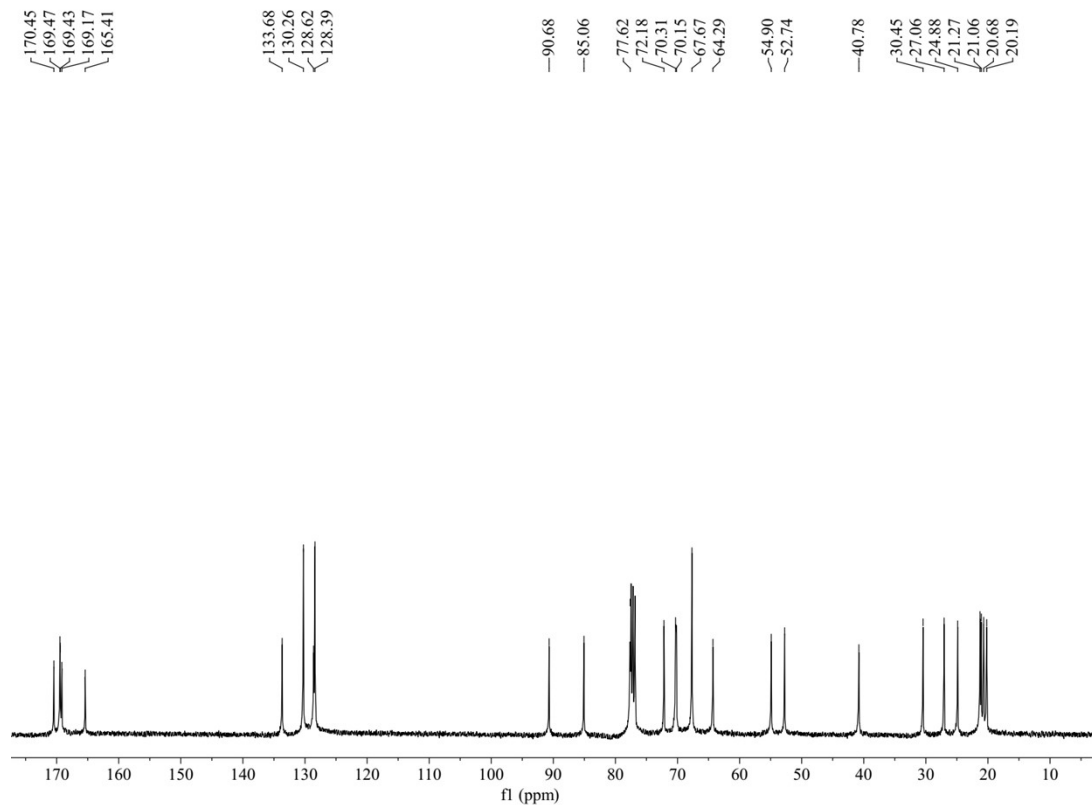

**Figure S7**  $^{13}\text{C}$  NMR spectrum (100 MHz,  $\text{CDCl}_3$ ) of compound **1**

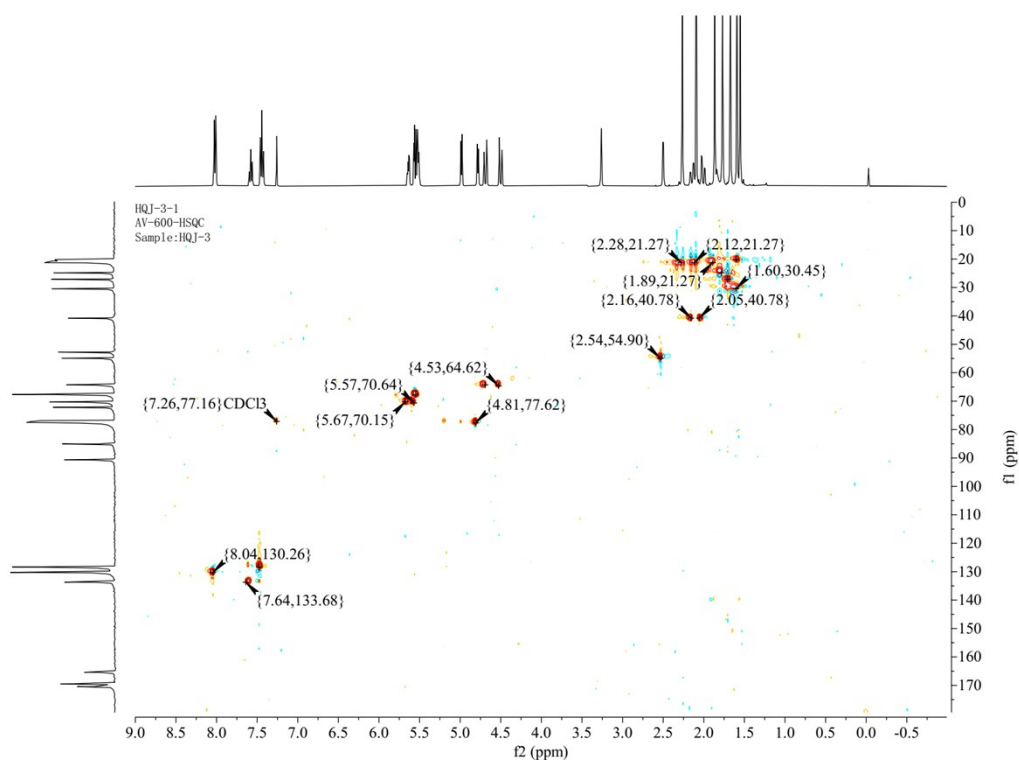

**Figure S8** HSQC spectrum (600 MHz,  $\text{CDCl}_3$ ) of compound **1**

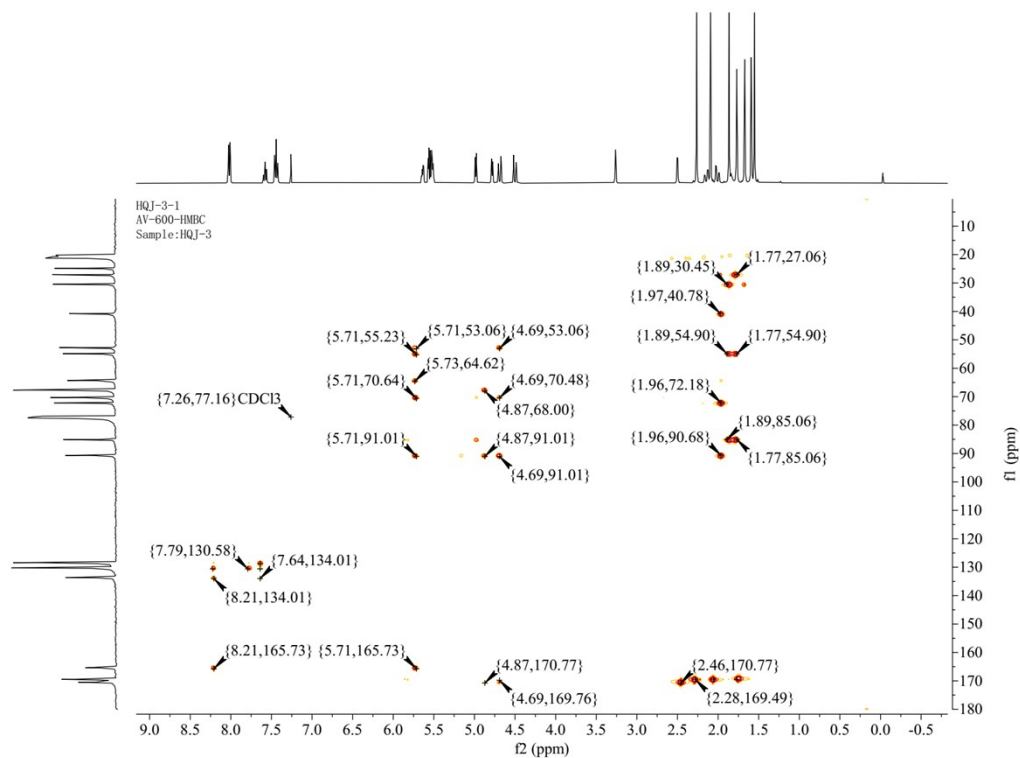

Figure S9 HMBC spectrum (600 MHz, CDCl<sub>3</sub>) of compound 1

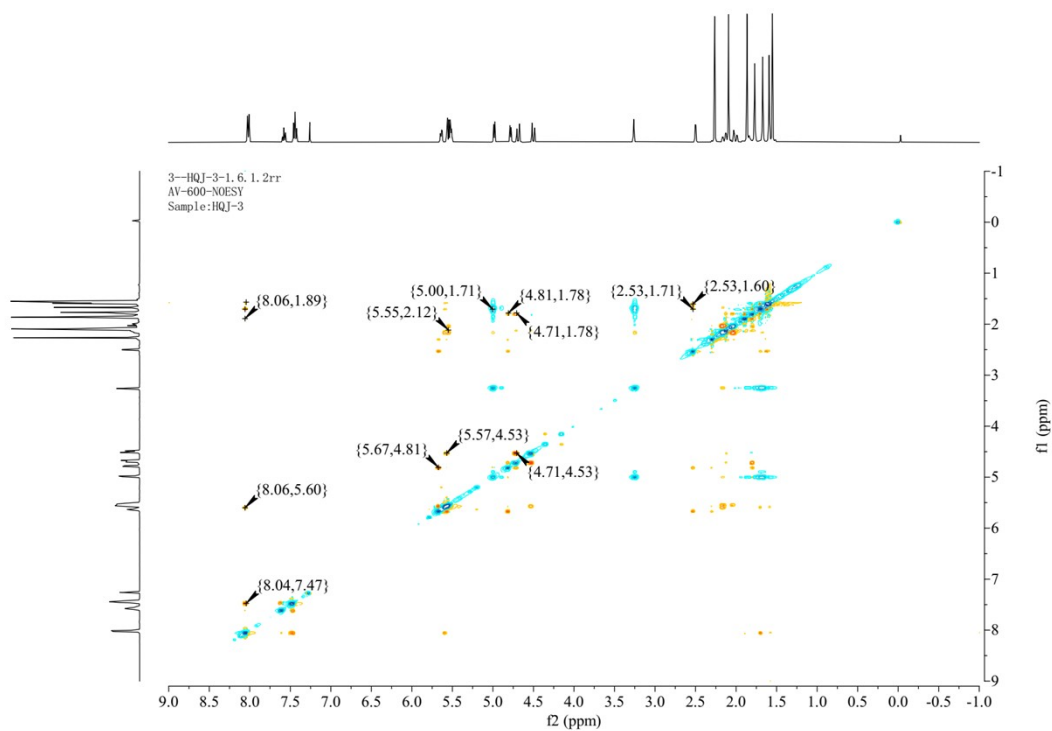

Figure S10 NOESY spectrum (600 MHz, CDCl<sub>3</sub>) of compound 1

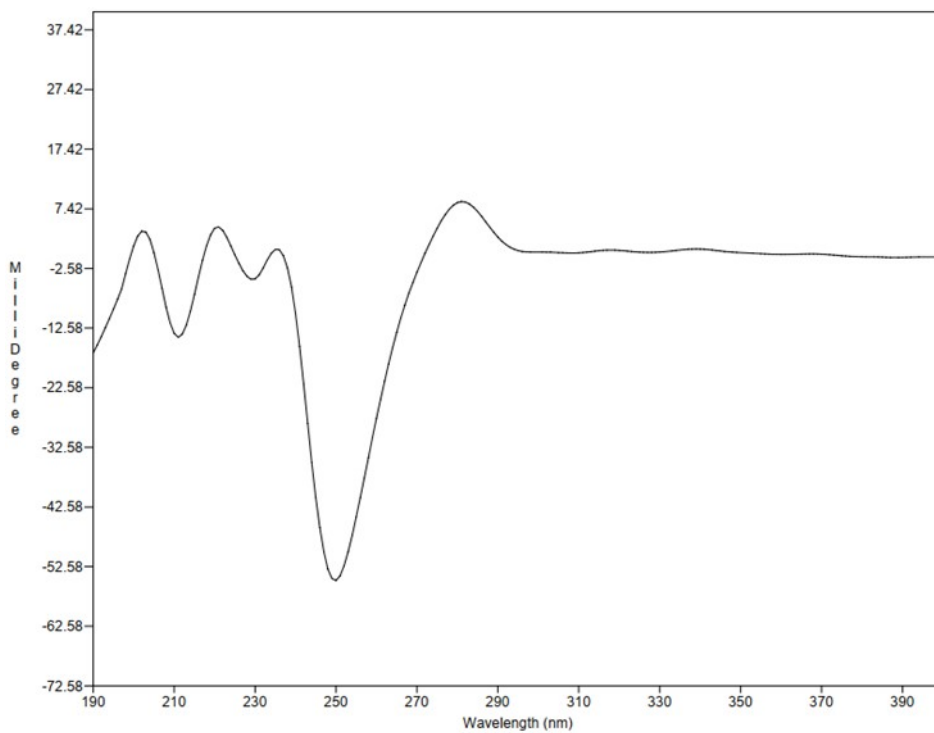

**Figure S11** Experimental ECD spectrum of compound **1**

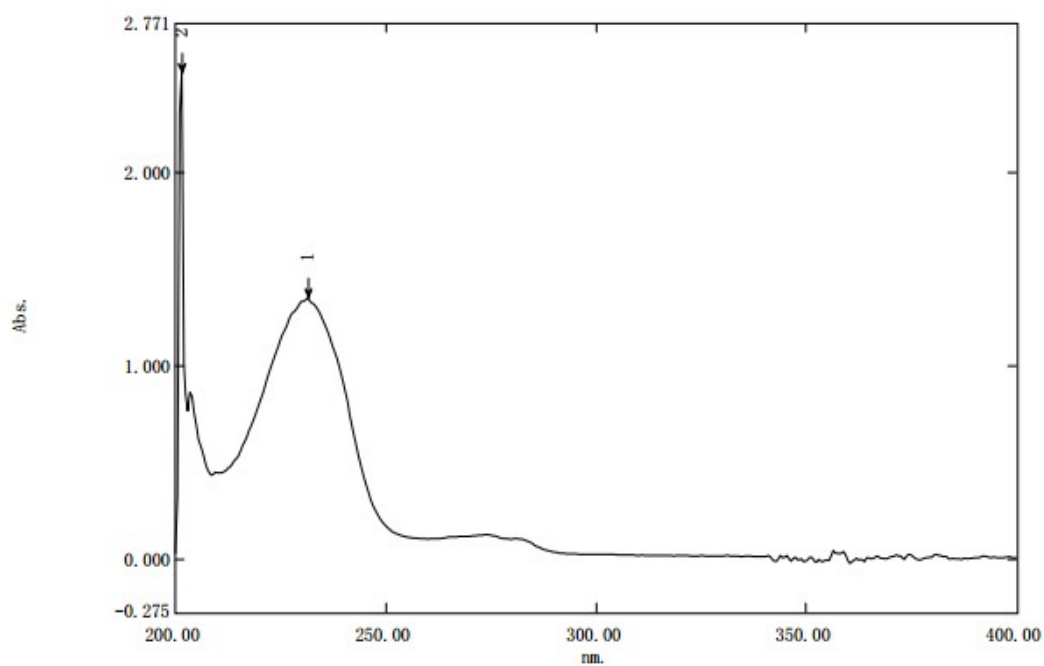

**Figure S12** UV spectrum of compound **2**

| Acquisition Parameter |          |                       |           |                  |           |
|-----------------------|----------|-----------------------|-----------|------------------|-----------|
| Source Type           | ESI      | Ion Polarity          | Positive  | Set Nebulizer    | 1.2 Bar   |
| Focus                 | Active   | Set Capillary         | 4500 V    | Set Dry Heater   | 180 °C    |
| Scan Begin            | 50 m/z   | Set End Plate Offset  | -500 V    | Set Dry Gas      | 8.0 l/min |
| Scan End              | 1500 m/z | Set Collision Cell RF | 400.0 Vpp | Set Divert Valve | Source    |

  

| Generate Molecular Formula Parameter |                        |         |
|--------------------------------------|------------------------|---------|
| Formula, min.                        |                        |         |
| Formula, max.                        |                        |         |
| Measured m/z                         | Tolerance              | Charge  |
| Check Valence                        | Minimum                | Maximum |
| Nitrogen Rule                        | Electron Configuration |         |
| Filter H/C Ratio                     | Minimum                | Maximum |
| Estimate Carbon                      |                        |         |

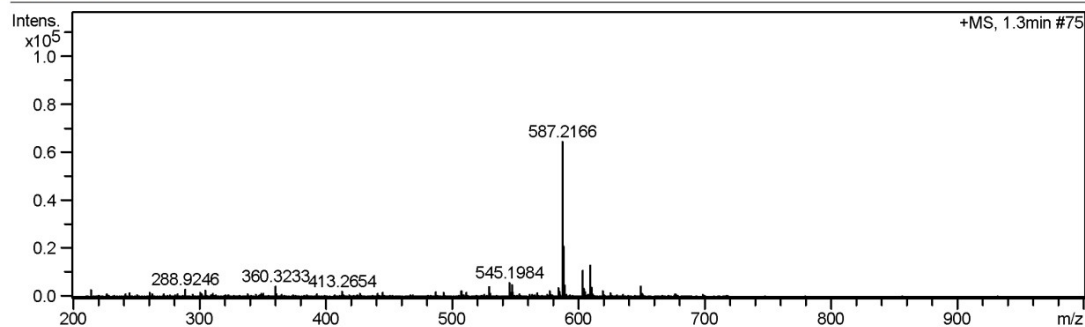

**Figure S13** HRESIMS spectrum of compound **2**

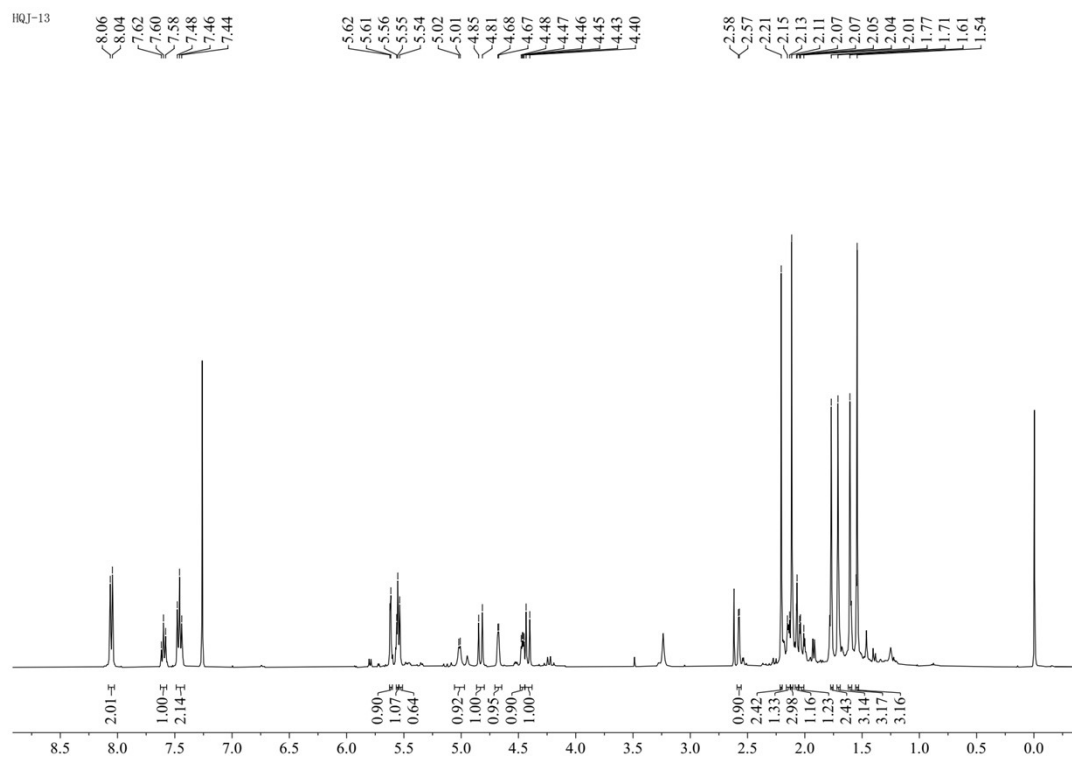

**Figure S14** <sup>1</sup>H NMR spectrum (400 MHz, CDCl<sub>3</sub>) of compound **2**

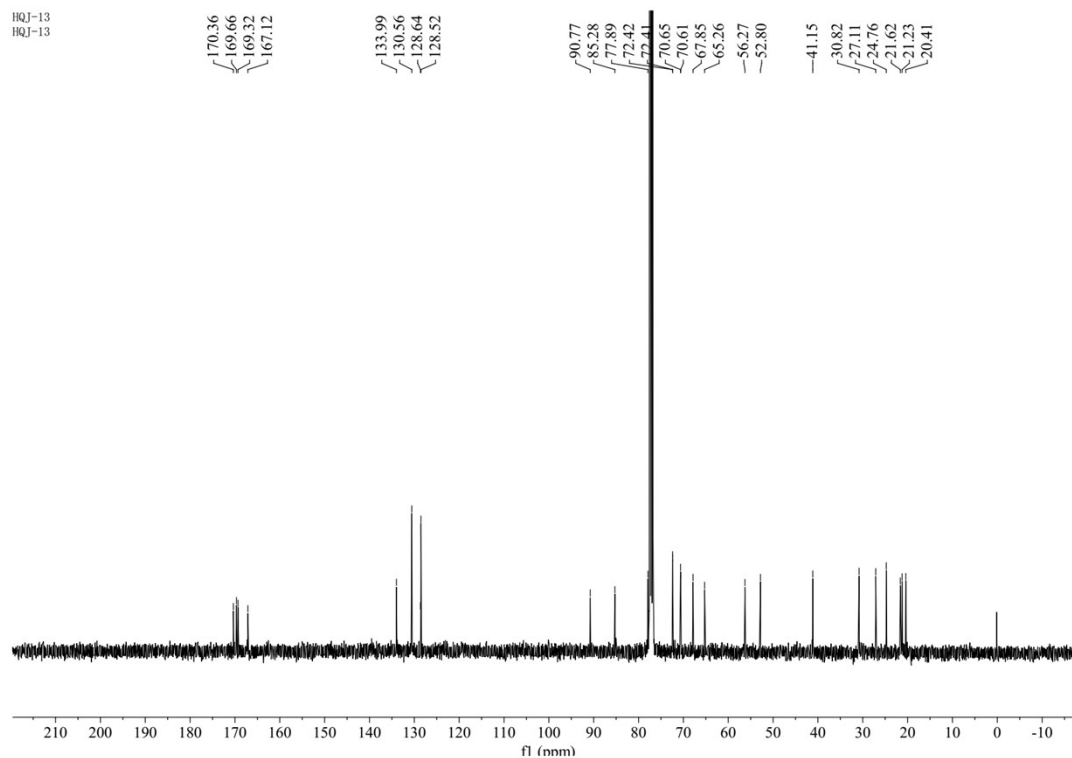

Figure S15  $^{13}\text{C}$  NMR spectrum (100 MHz,  $\text{CDCl}_3$ ) of compound **2**

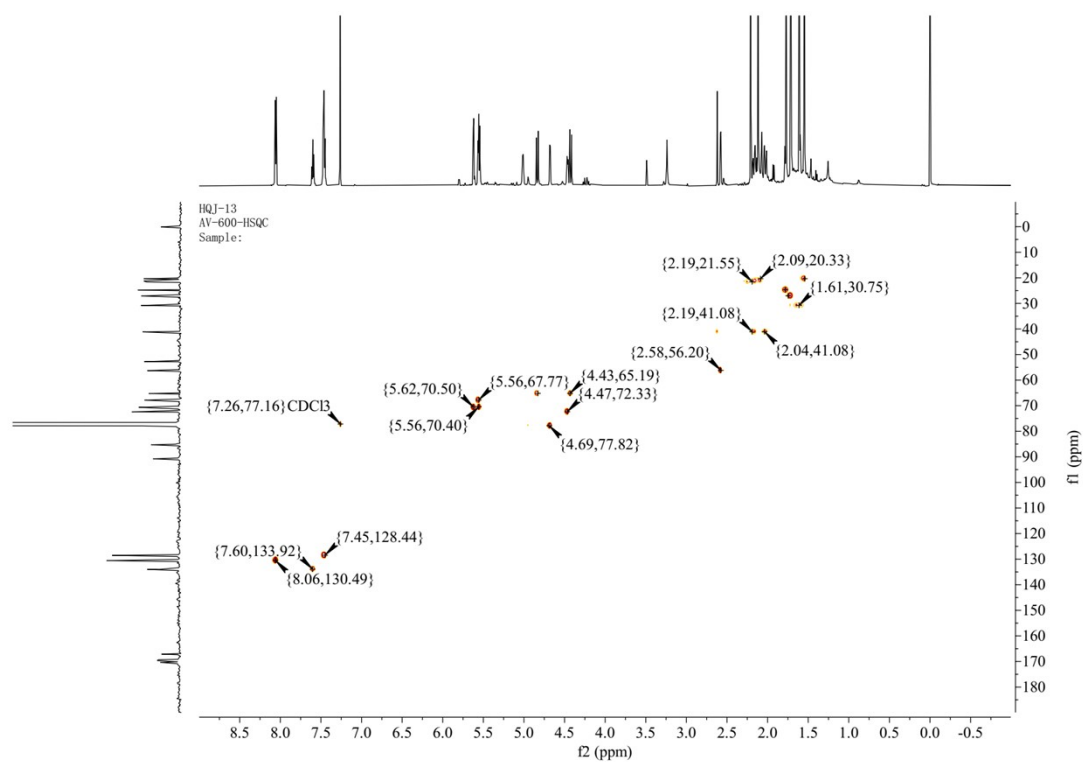

Figure S16 HSQC spectrum (600 MHz,  $\text{CDCl}_3$ ) of compound **2**

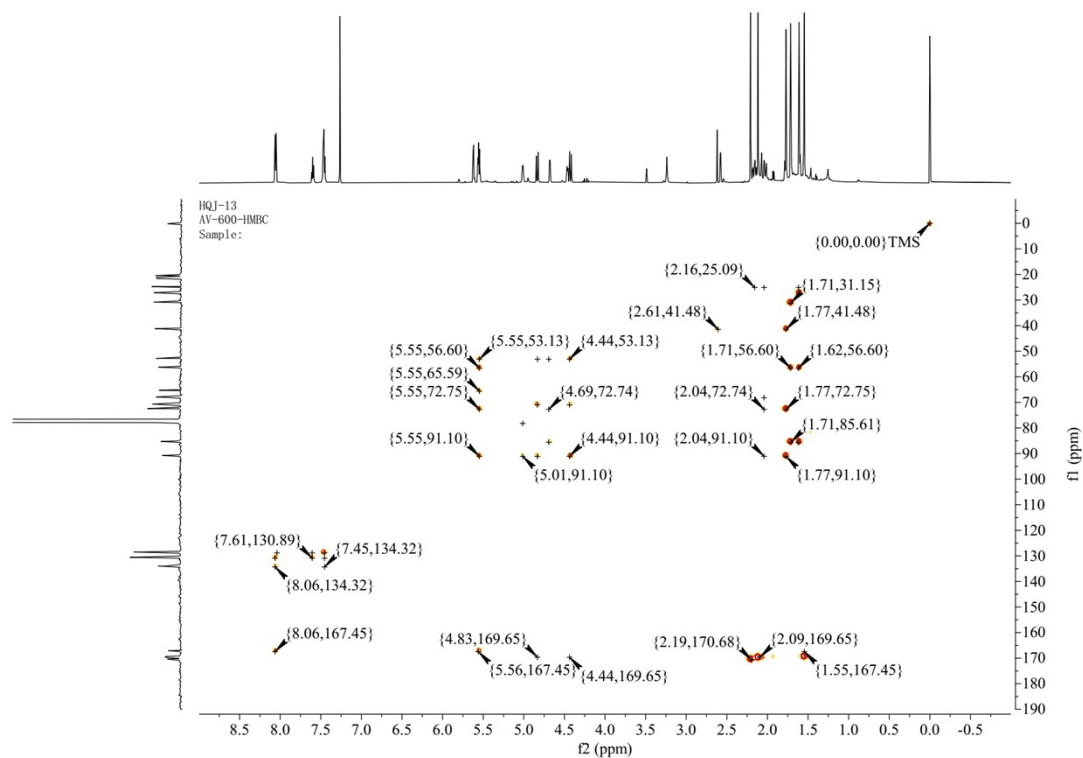

**Figure S17** HMBC spectrum (600 MHz, CDCl<sub>3</sub>) of compound **2**

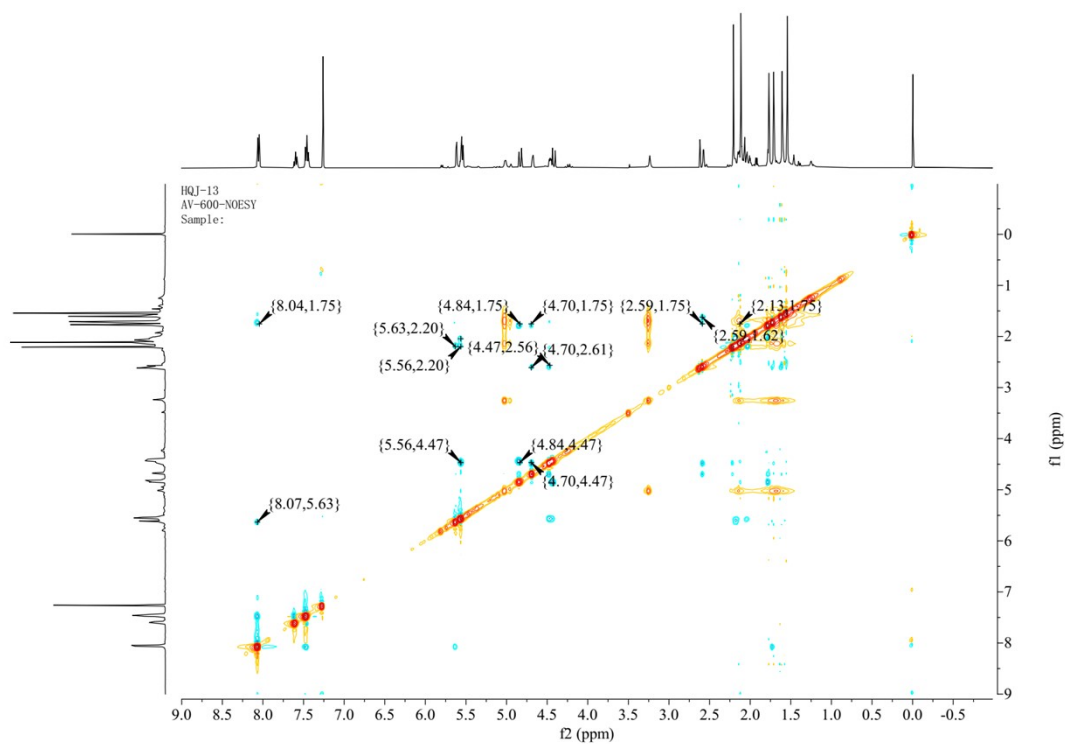

**Figure S18** NOESY spectrum (600 MHz, CDCl<sub>3</sub>) of compound **2**

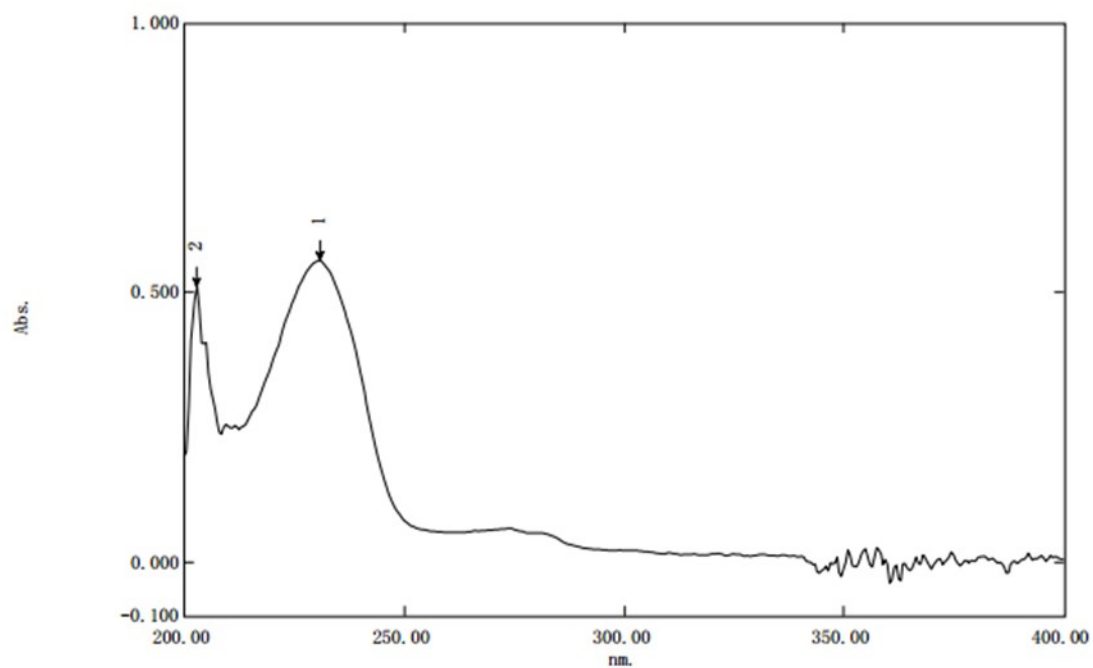

**Figure S19** Experimental ECD spectrum of compound 2

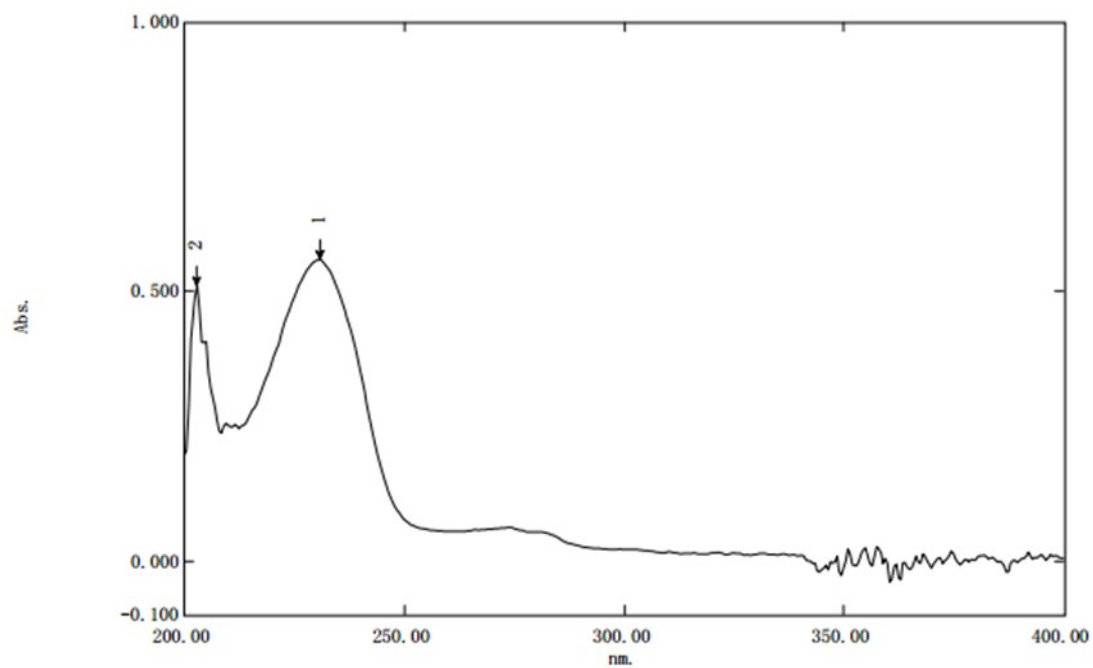

**Figure S20** UV spectrum of compound 3

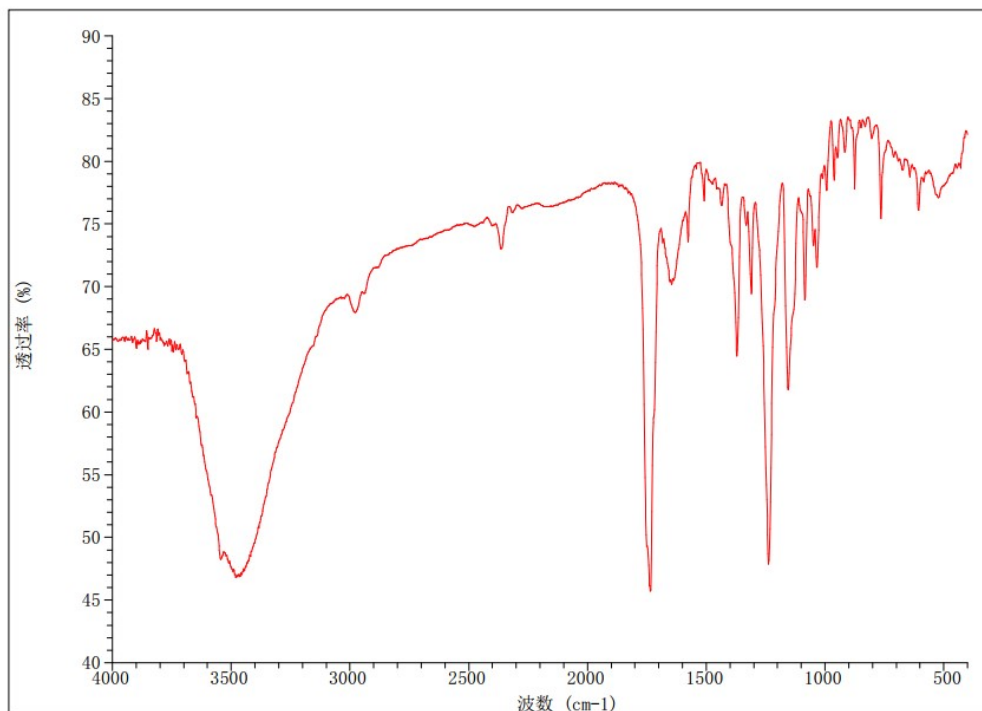

**Figure S21** IR spectrum of compound **3**

**Acquisition Parameter**

|             |          |                       |           |                  |           |
|-------------|----------|-----------------------|-----------|------------------|-----------|
| Source Type | ESI      | Ion Polarity          | Positive  | Set Nebulizer    | 1.2 Bar   |
| Focus       | Active   | Set Capillary         | 4500 V    | Set Dry Heater   | 180 °C    |
| Scan Begin  | 50 m/z   | Set End Plate Offset  | -500 V    | Set Dry Gas      | 8.0 l/min |
| Scan End    | 1500 m/z | Set Collision Cell RF | 400.0 Vpp | Set Divert Valve | Source    |

**Generate Molecular Formula Parameter**

|                  |                        |         |
|------------------|------------------------|---------|
| Formula, min.    |                        |         |
| Formula, max.    |                        |         |
| Measured m/z     | Tolerance              | Charge  |
| Check Valence    | Minimum                | Maximum |
| Nitrogen Rule    | Electron Configuration |         |
| Filter H/C Ratio | Minimum                | Maximum |
| Estimate Carbon  |                        |         |

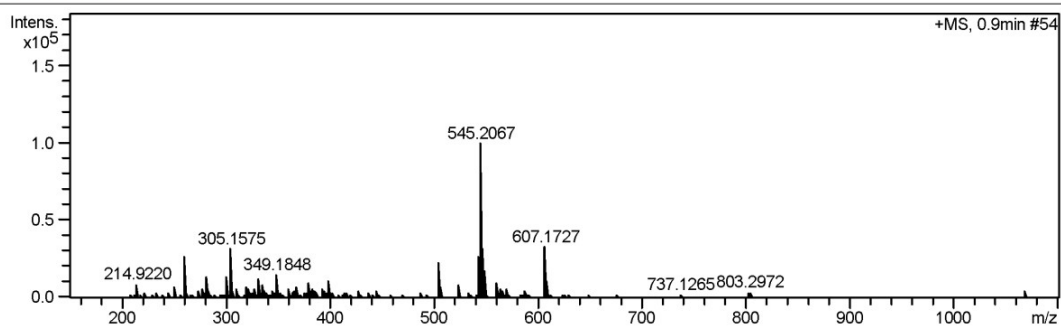

**Figure S22** HRESIMS spectrum of compound **3**



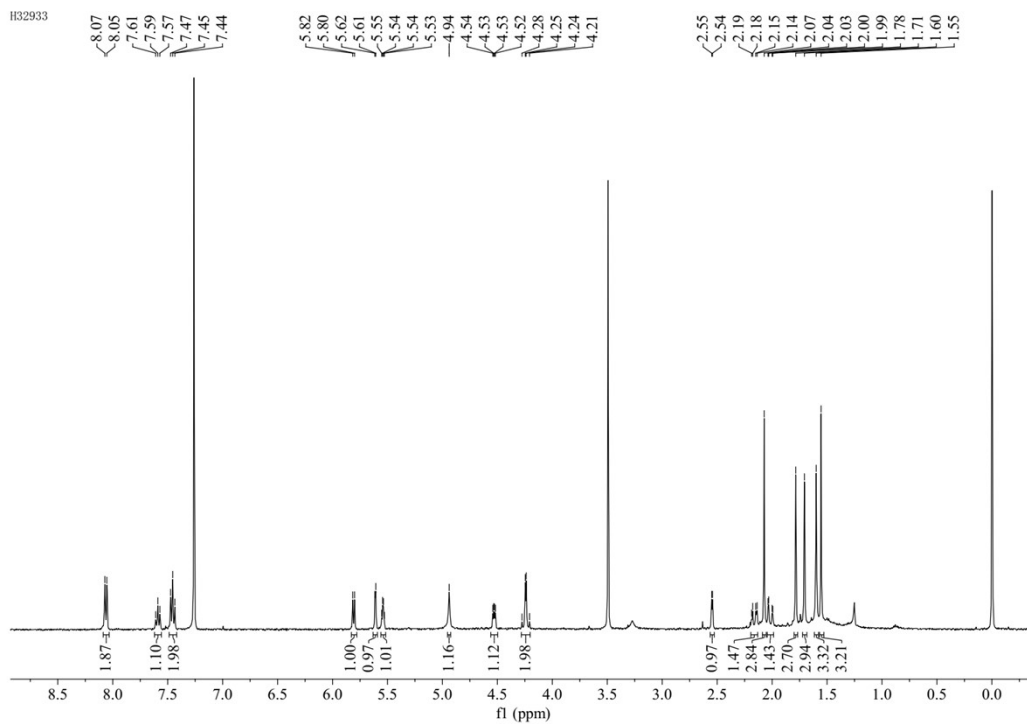

Figure S23  $^1\text{H}$  NMR spectrum (400 MHz,  $\text{CDCl}_3$ ) of compound **3**

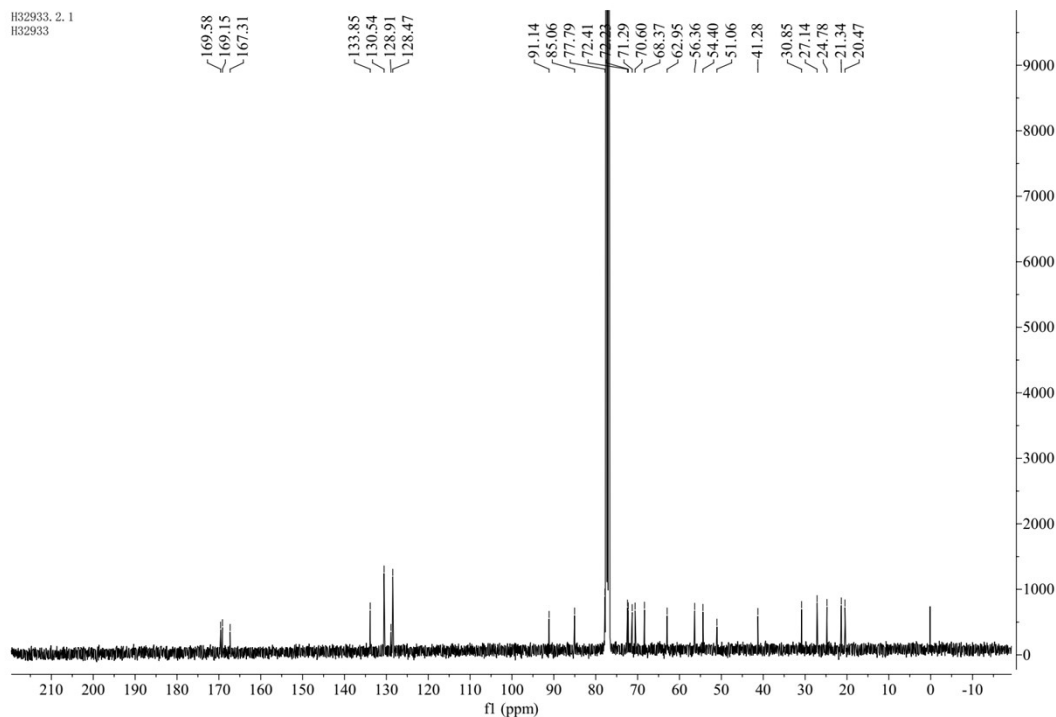

Figure S24  $^{13}\text{C}$  NMR spectrum (100 MHz,  $\text{CDCl}_3$ ) of compound **3**

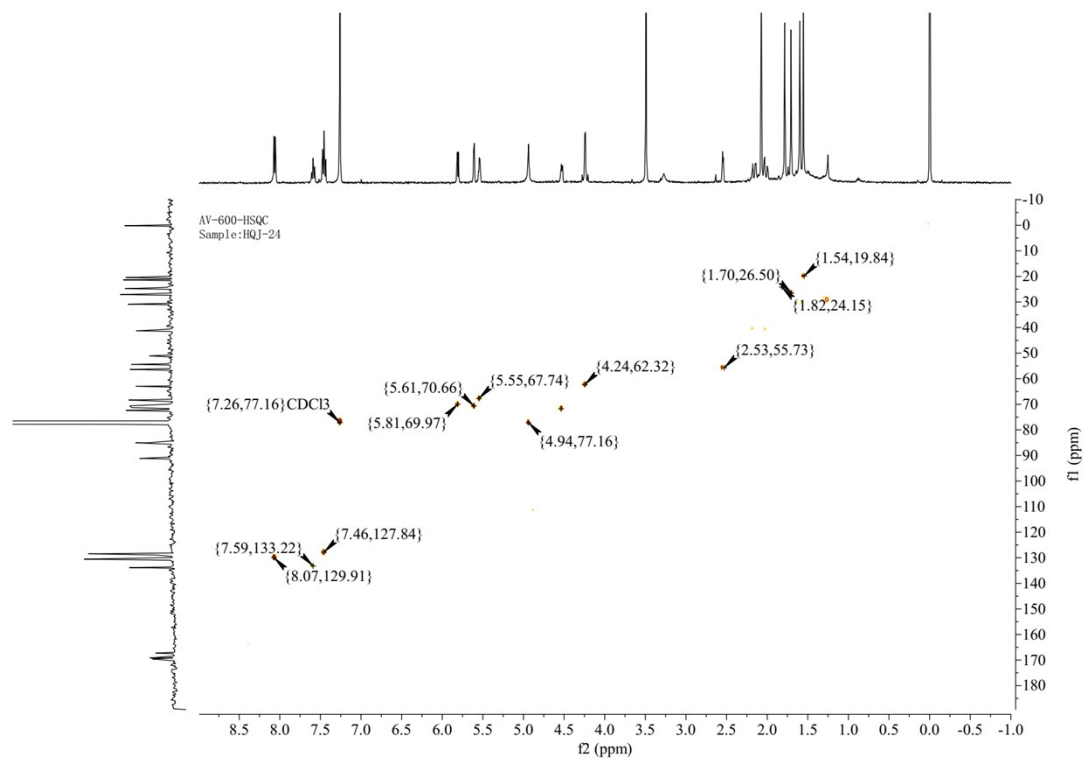

**Figure S25** HSQC spectrum (600 MHz, CDCl<sub>3</sub>) of compound **3**

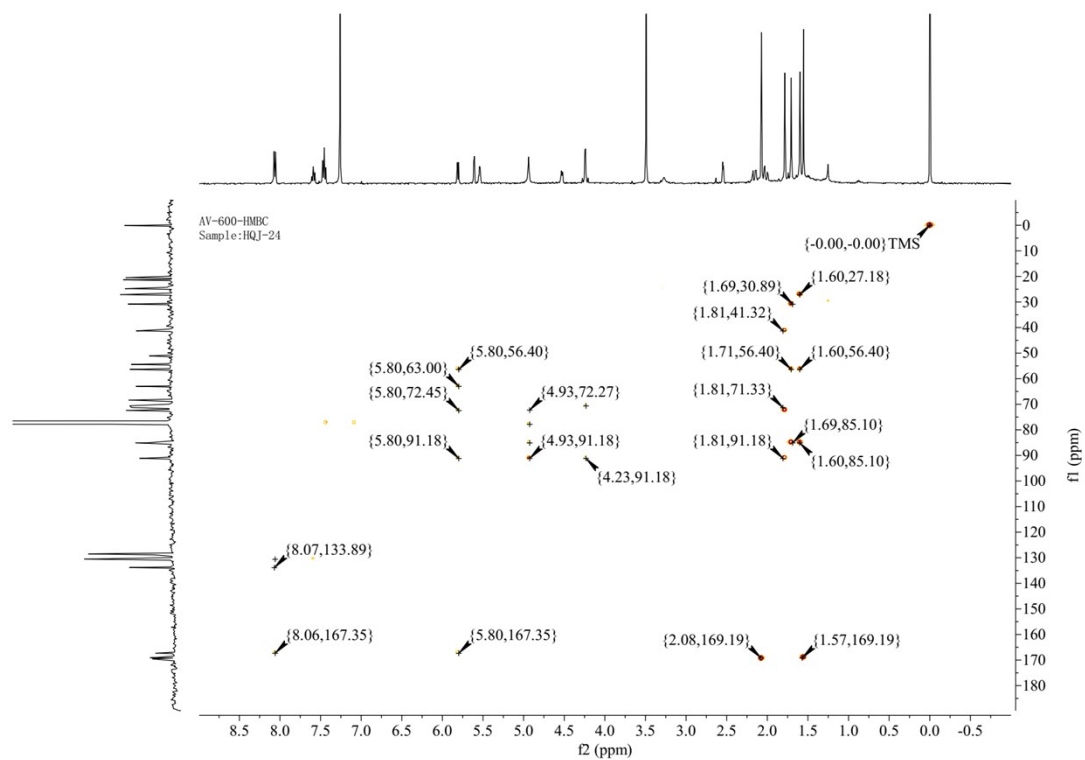

**Figure S26** HMBC spectrum (600 MHz, CDCl<sub>3</sub>) of compound **3**

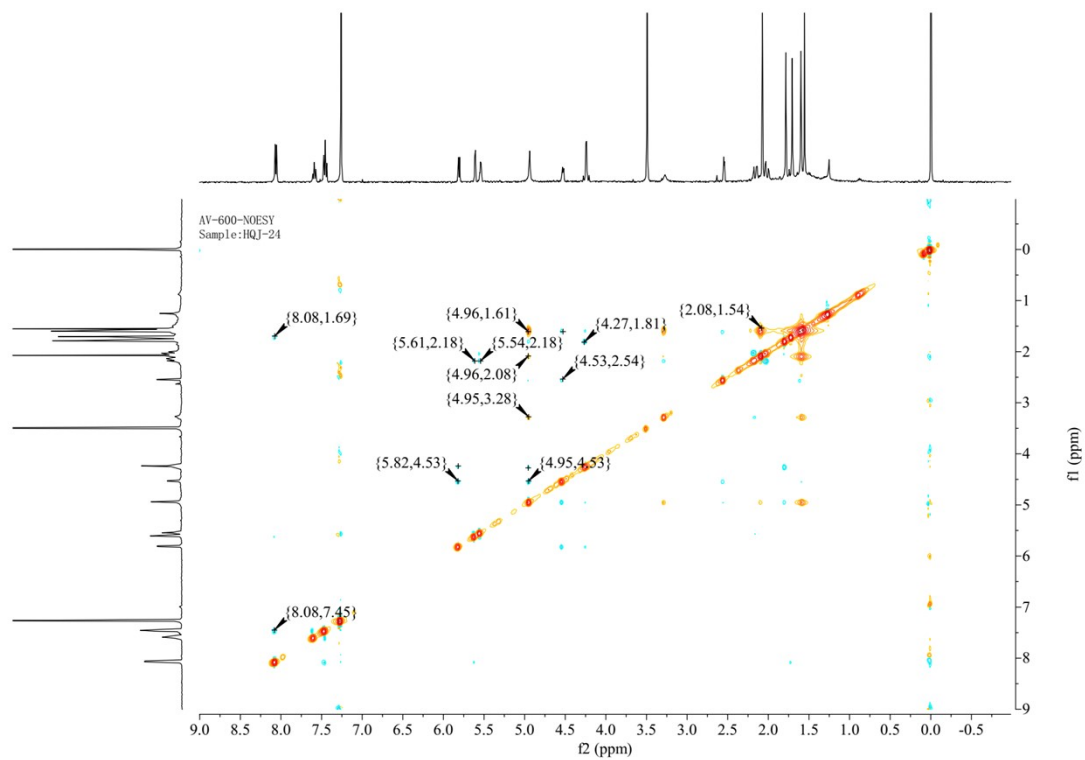

**Figure S27** NOESY spectrum (600 MHz,  $\text{CDCl}_3$ ) of compound **3**

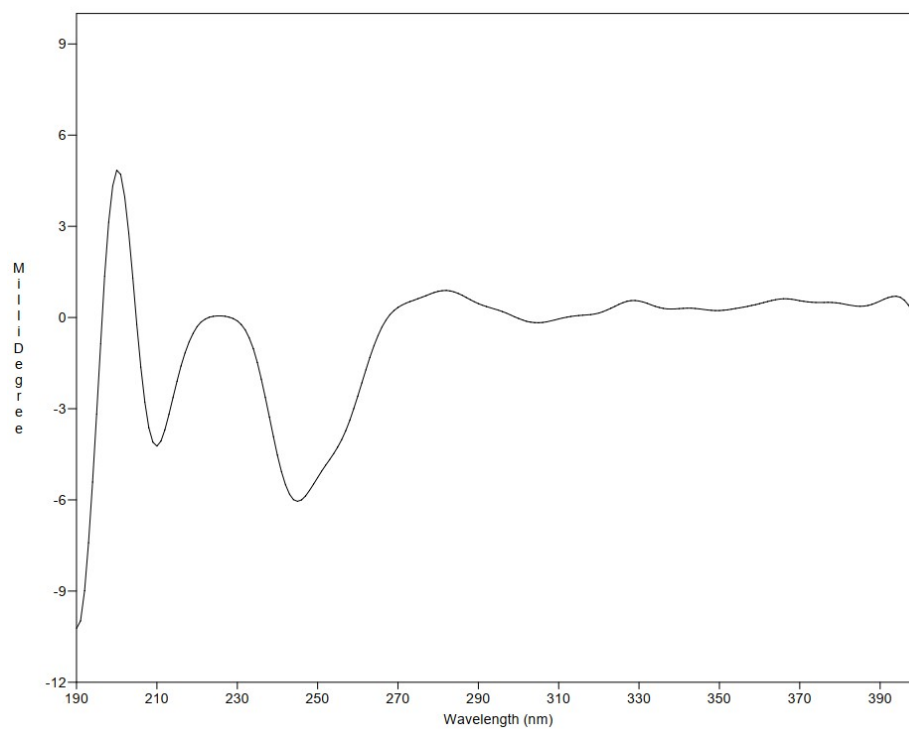

**Figure S28** Experimental ECD spectrum of compound **3**

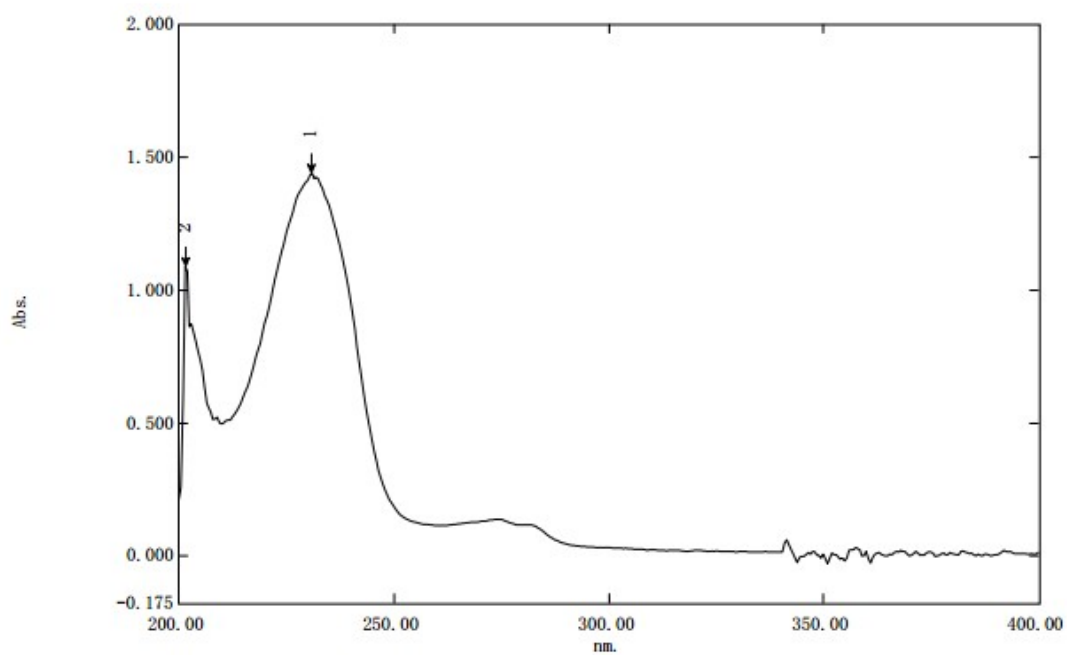

Figure S29 UV spectrum of compound 4

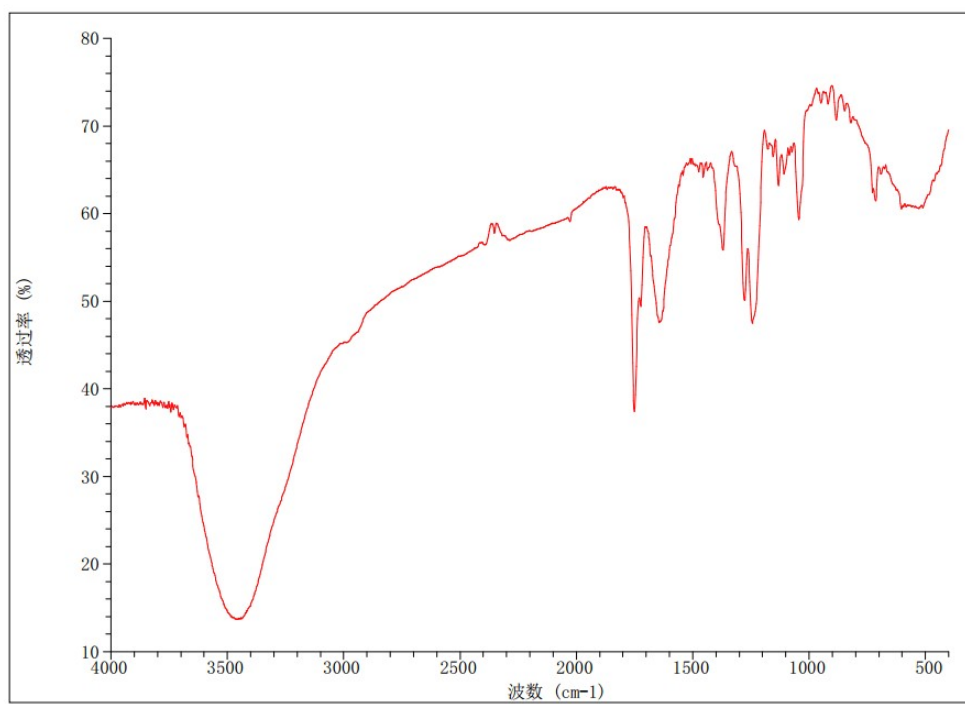

Figure S30 IR spectrum of compound 4

| Acquisition Parameter                |          |                        |           |                  |           |
|--------------------------------------|----------|------------------------|-----------|------------------|-----------|
| Source Type                          | ESI      | Ion Polarity           | Positive  | Set Nebulizer    | 1.2 Bar   |
| Focus                                | Active   | Set Capillary          | 4500 V    | Set Dry Heater   | 180 °C    |
| Scan Begin                           | 50 m/z   | Set End Plate Offset   | -500 V    | Set Dry Gas      | 8.0 l/min |
| Scan End                             | 1500 m/z | Set Collision Cell RF  | 300.0 Vpp | Set Divert Valve | Source    |
| Generate Molecular Formula Parameter |          |                        |           |                  |           |
| Formula, min.                        |          | Tolerance              |           | Charge           |           |
| Formula, max.                        |          | Minimum                |           | Maximum          |           |
| Measured m/z                         |          | Electron Configuration |           |                  |           |
| Check Valence                        |          | Minimum                |           | Maximum          |           |
| Nitrogen Rule                        |          |                        |           |                  |           |
| Filter H/C Ratio                     |          |                        |           |                  |           |
| Estimate Carbon                      |          |                        |           |                  |           |

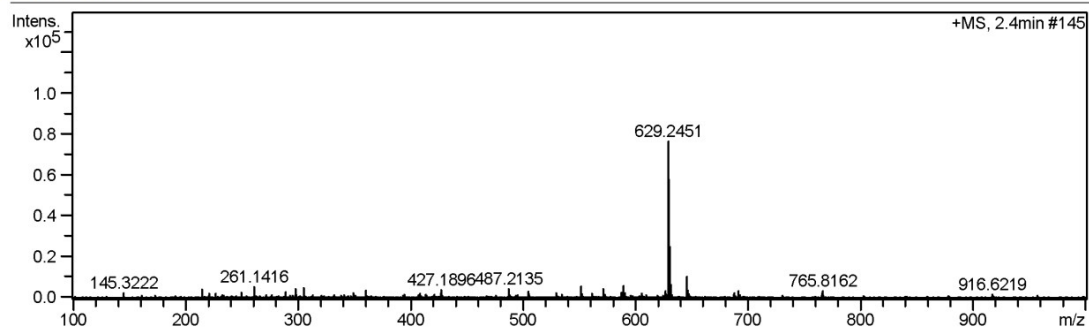

Figure S31 HRESIMS spectrum of compound 4

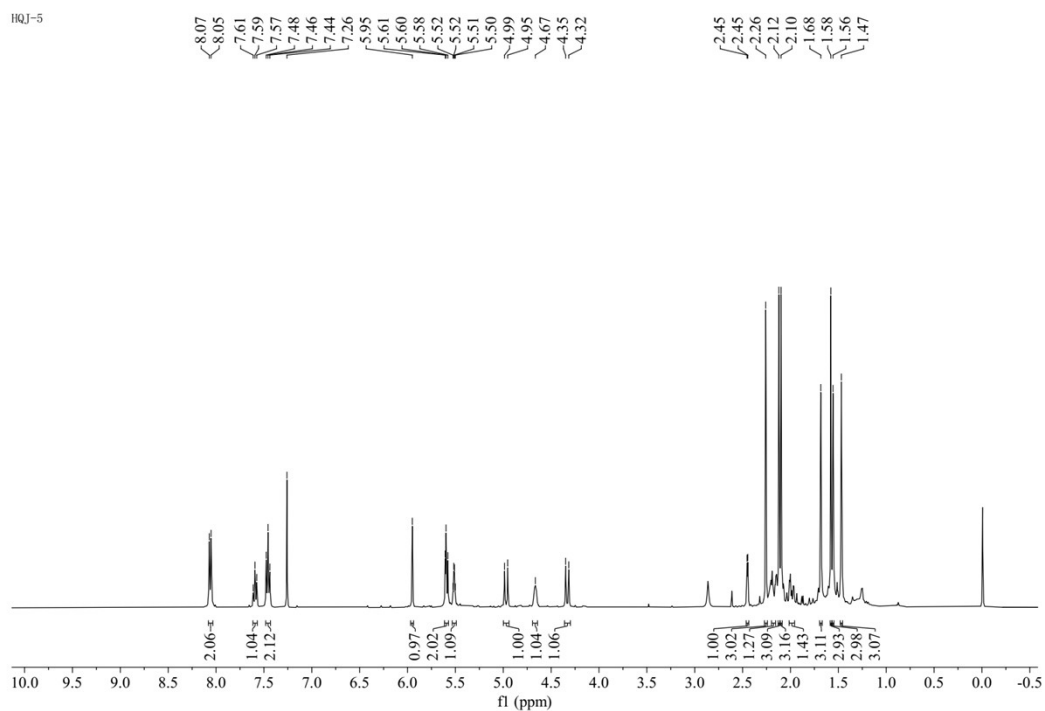

Figure S32 <sup>1</sup>H NMR spectrum (400 MHz, CDCl<sub>3</sub>) of compound 4

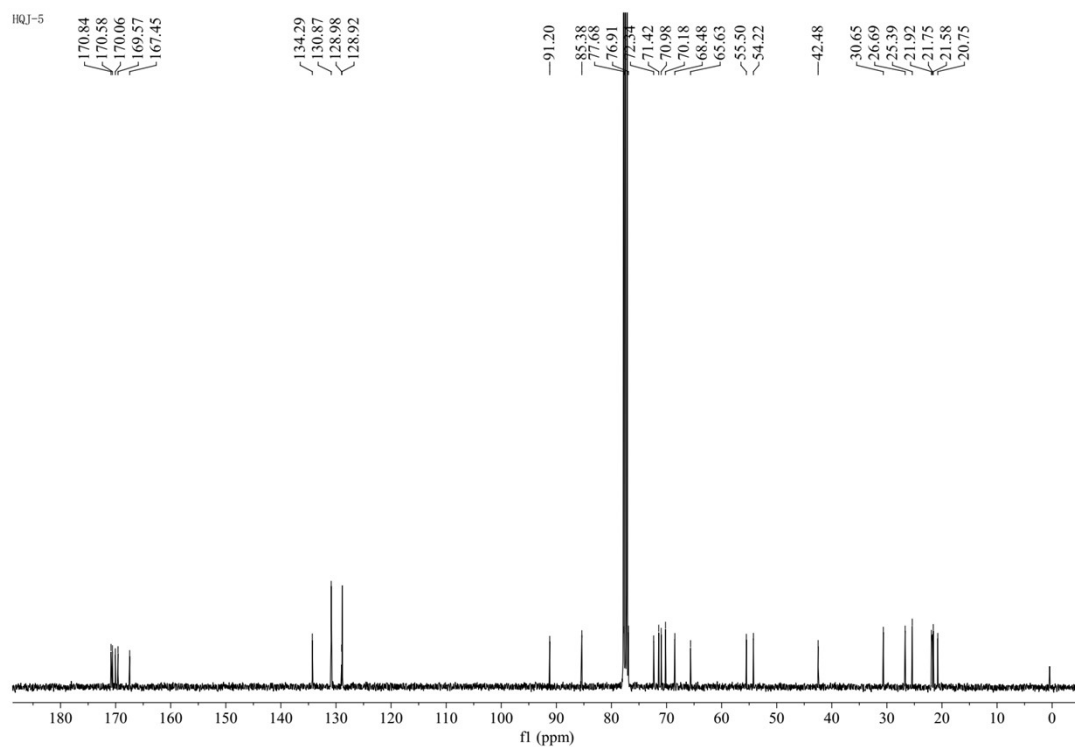

Figure S33  $^{13}\text{C}$  NMR spectrum (100 MHz,  $\text{CDCl}_3$ ) of compound 4

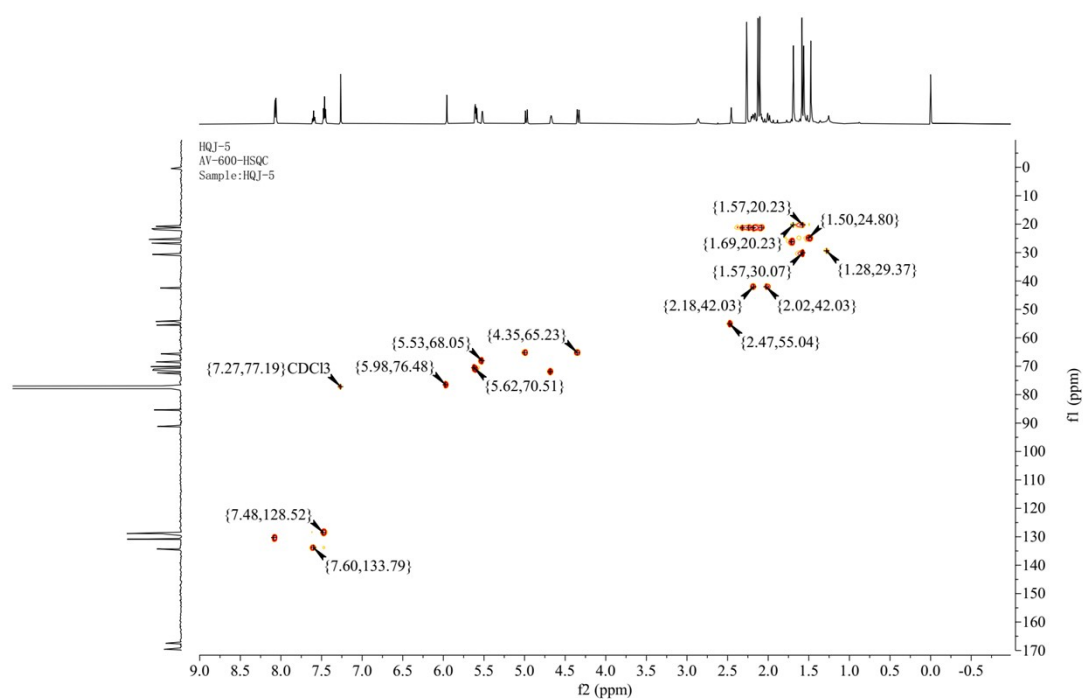

Figure S34 HSQC spectrum (600 MHz,  $\text{CDCl}_3$ ) of compound 4

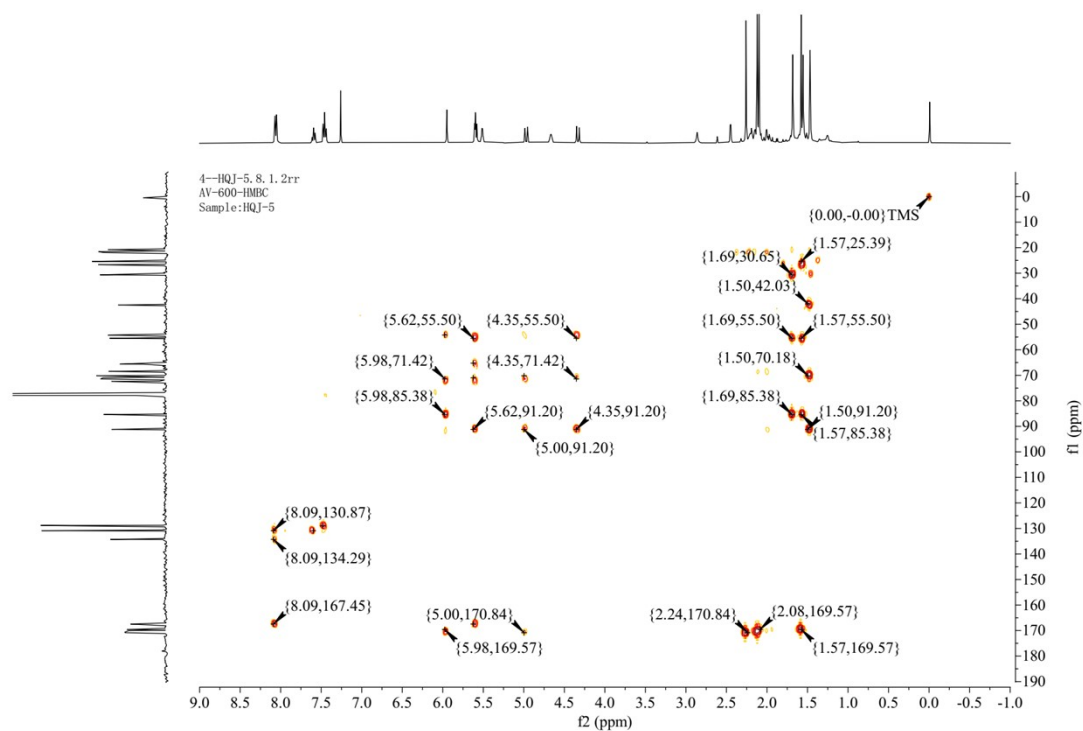

Figure S35 HMBC spectrum (600 MHz,  $\text{CDCl}_3$ ) of compound 4

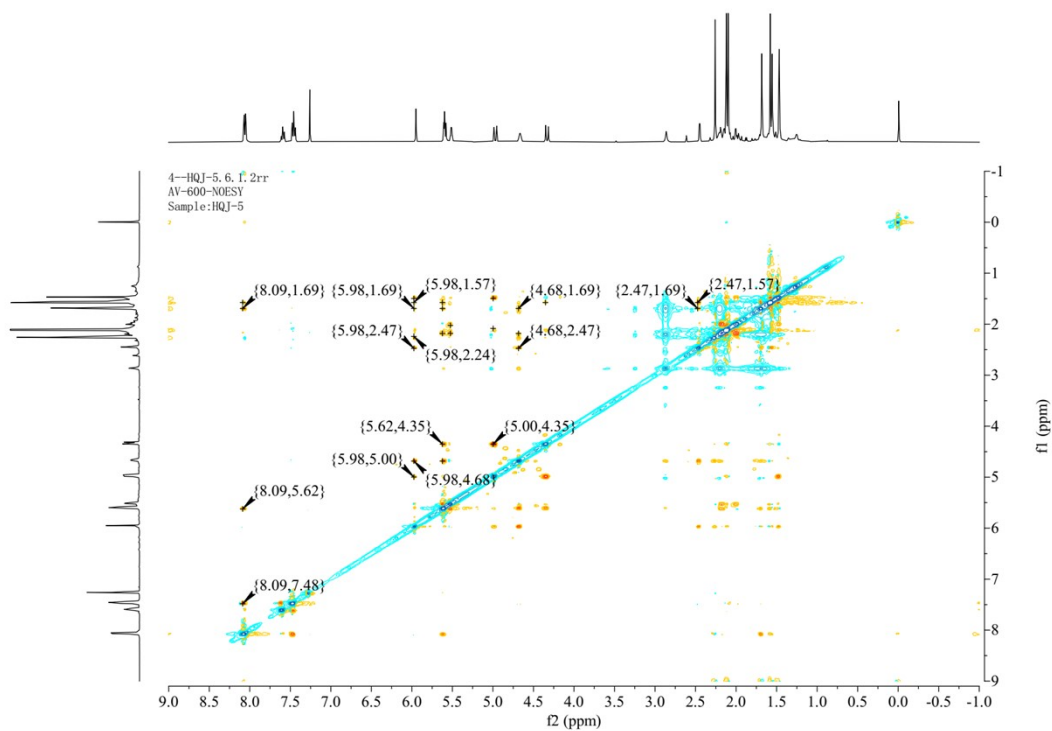

Figure S36 NOESY spectrum (600 MHz,  $\text{CDCl}_3$ ) of compound 4

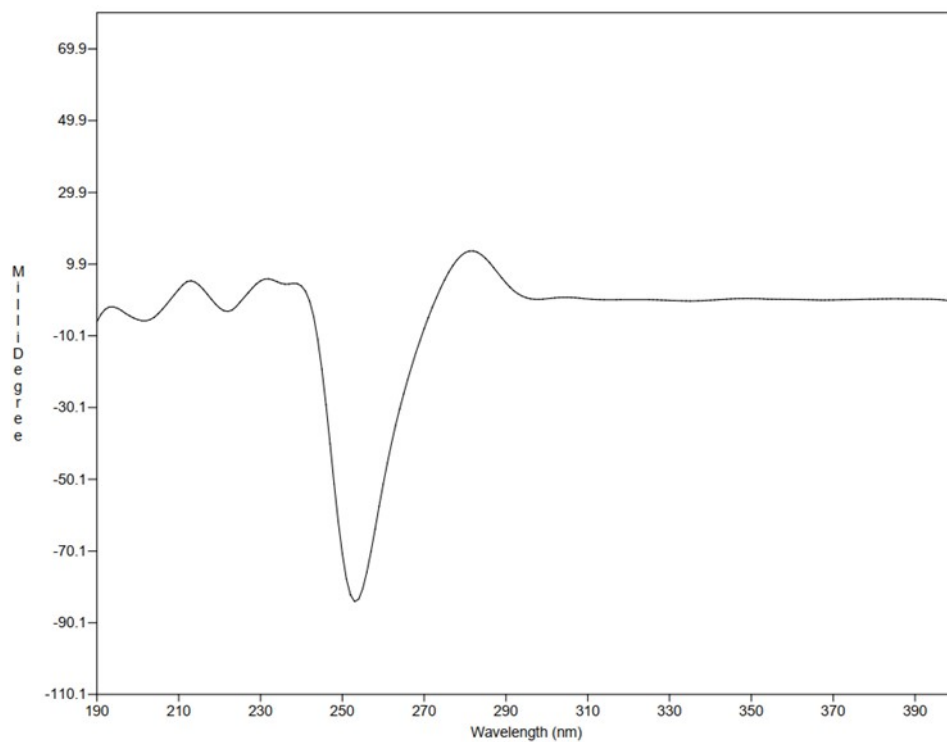

**Figure S37** Experimental ECD spectrum of compound 4

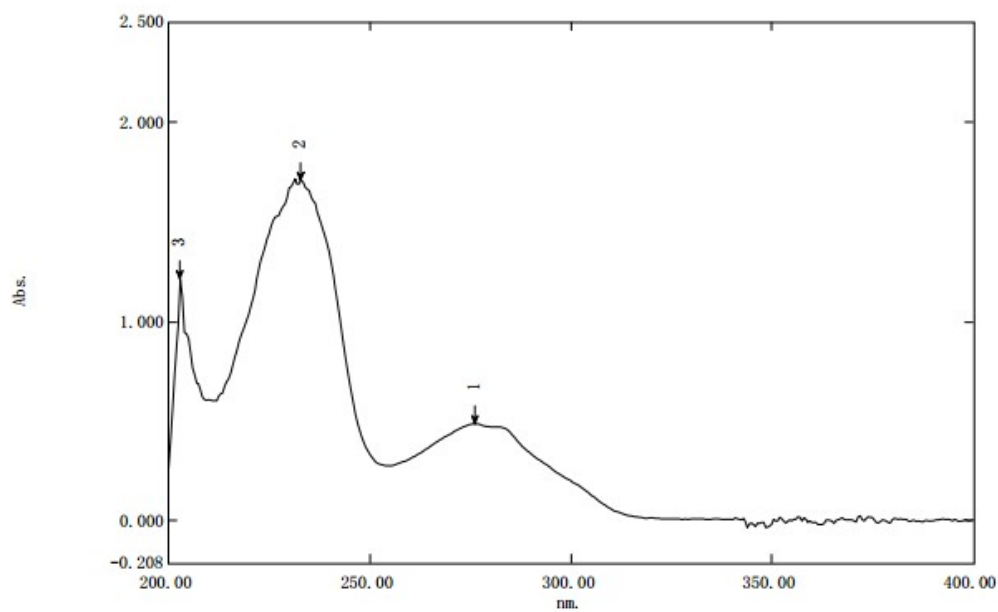

**Figure S38** UV spectrum of compound 5



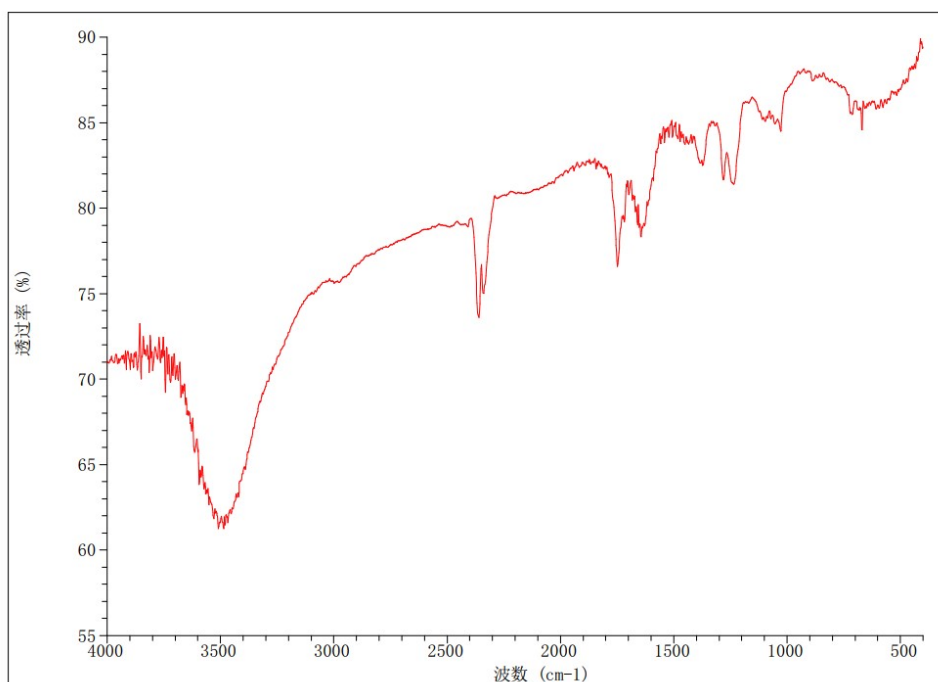

Figure S39 IR spectrum of compound 5

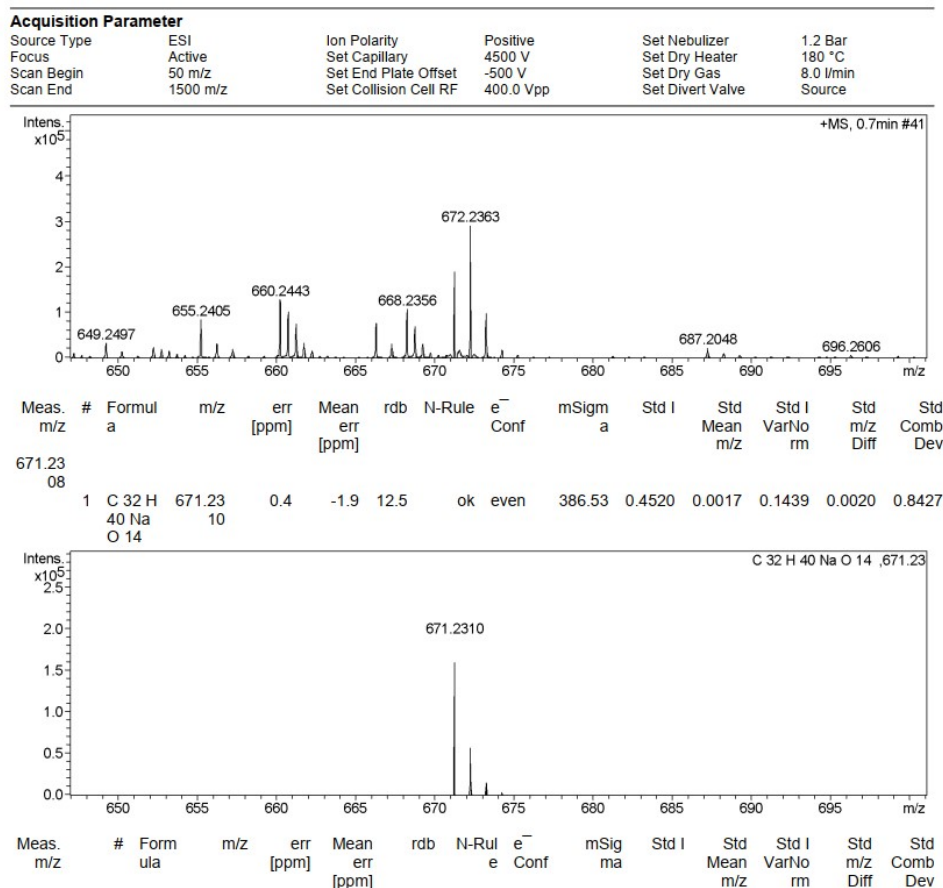

Figure S40 HRESIMS spectrum of compound 5

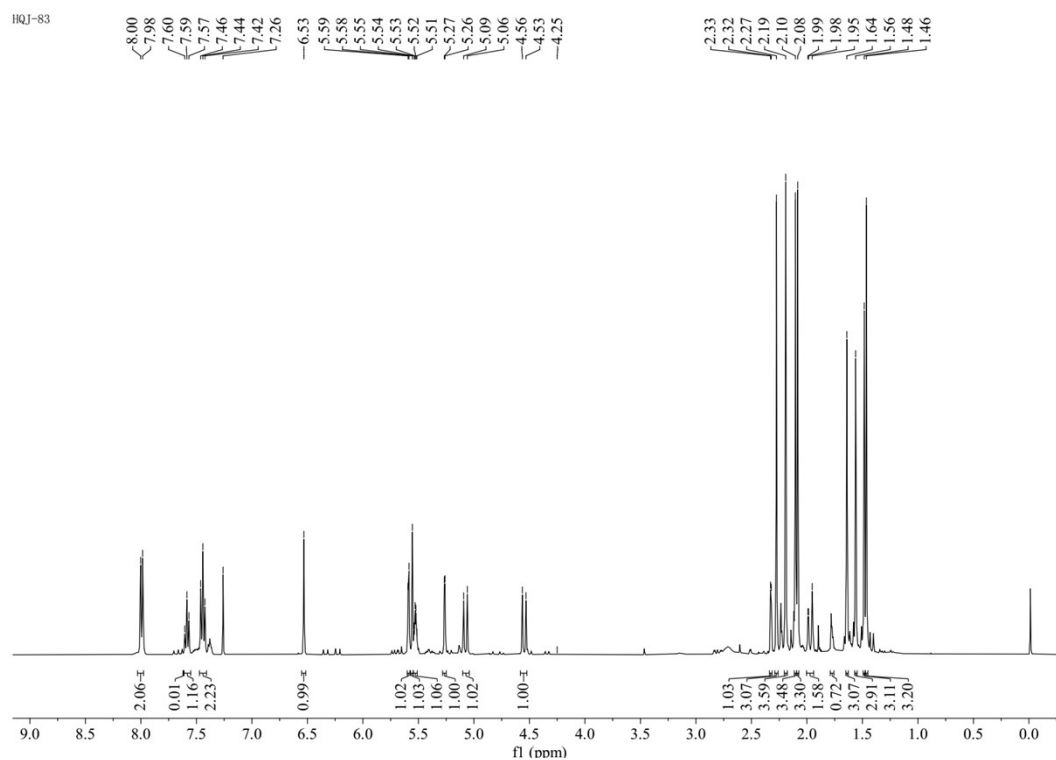

**Figure S41**  $^1\text{H}$  NMR spectrum (400 MHz,  $\text{CDCl}_3$ ) of compound **5**

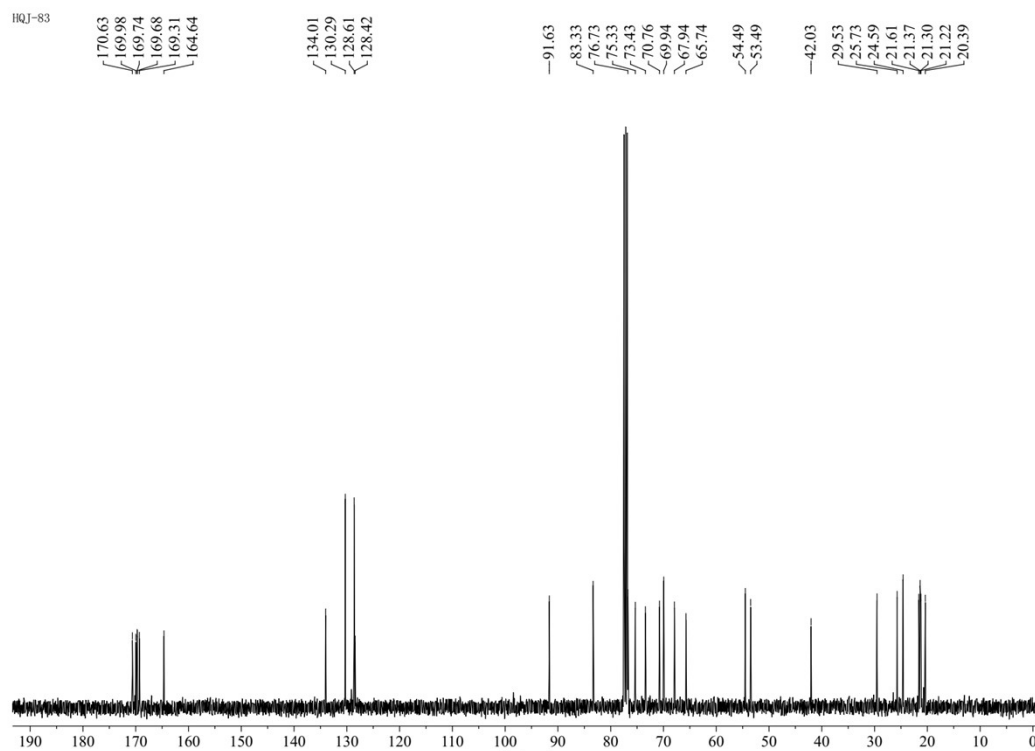

**Figure S42**  $^{13}\text{C}$  NMR spectrum (100 MHz,  $\text{CDCl}_3$ ) of compound **5**

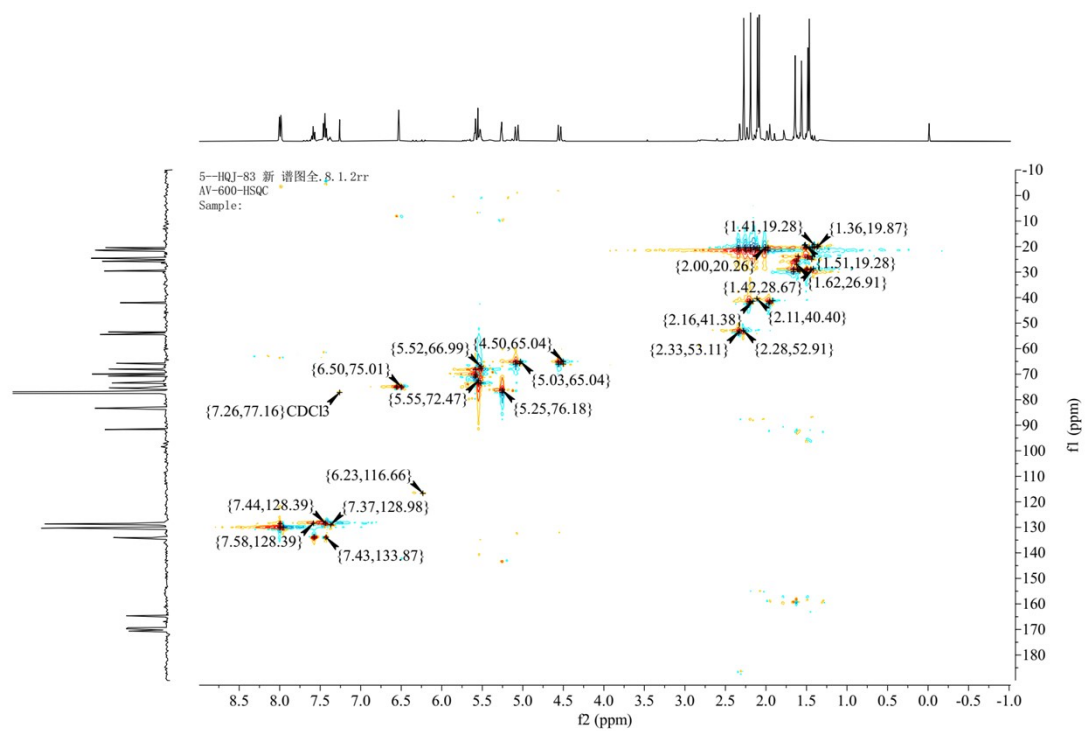

Figure S43 HSQC spectrum (600 MHz, CDCl<sub>3</sub>) of compound **5**

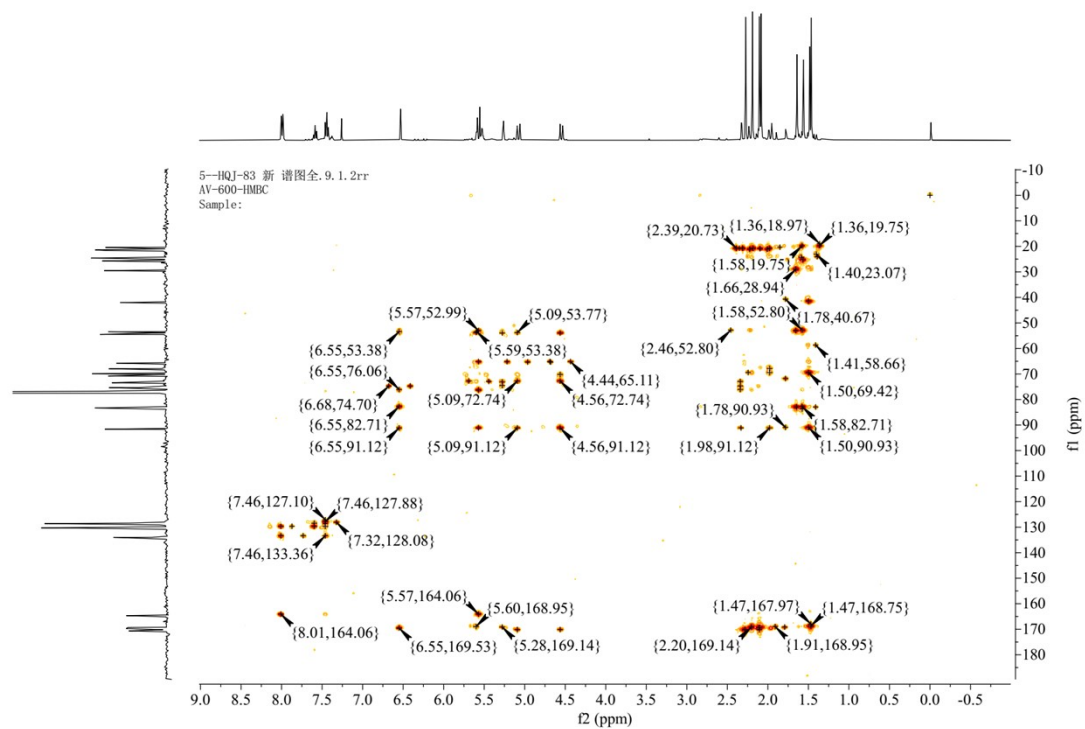

Figure S44 HMBC spectrum (600 MHz, CDCl<sub>3</sub>) of compound **5**

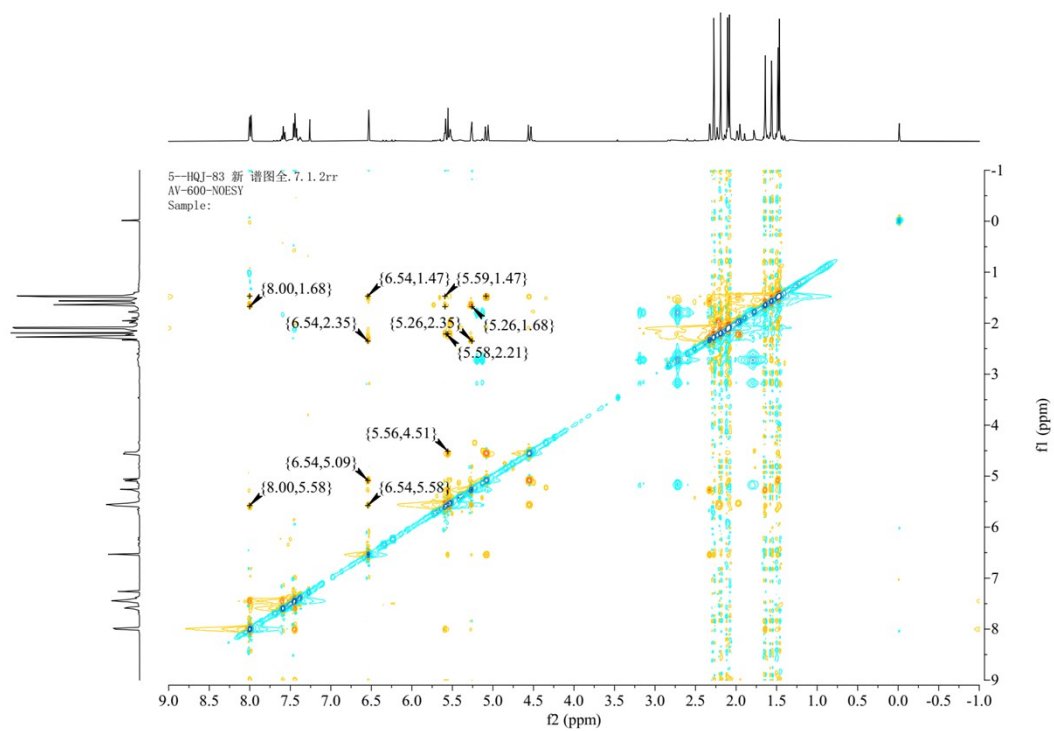

**Figure S45** NOESY spectrum (600 MHz,  $\text{CDCl}_3$ ) of compound **5**

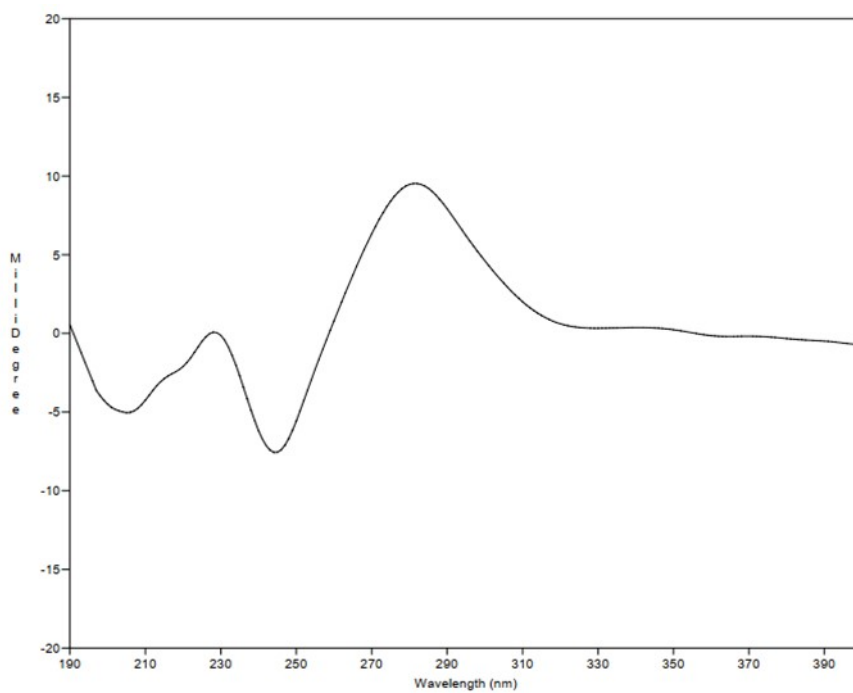

**Figure S46** Experimental ECD spectrum of compound **5**

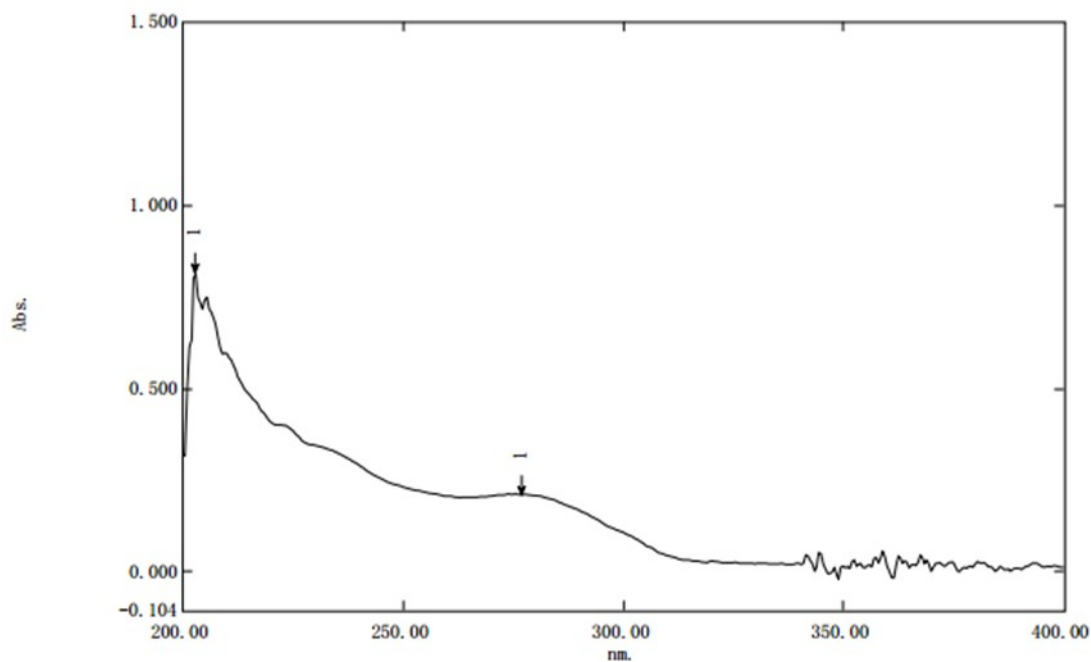

**Figure S47** UV spectrum of compound **6**

**Acquisition Parameter**

|             |          |                       |           |                  |           |
|-------------|----------|-----------------------|-----------|------------------|-----------|
| Source Type | ESI      | Ion Polarity          | Positive  | Set Nebulizer    | 1.2 Bar   |
| Focus       | Active   | Set Capillary         | 4500 V    | Set Dry Heater   | 180 °C    |
| Scan Begin  | 50 m/z   | Set End Plate Offset  | -500 V    | Set Dry Gas      | 8.0 l/min |
| Scan End    | 1500 m/z | Set Collision Cell RF | 400.0 Vpp | Set Divert Valve | Source    |

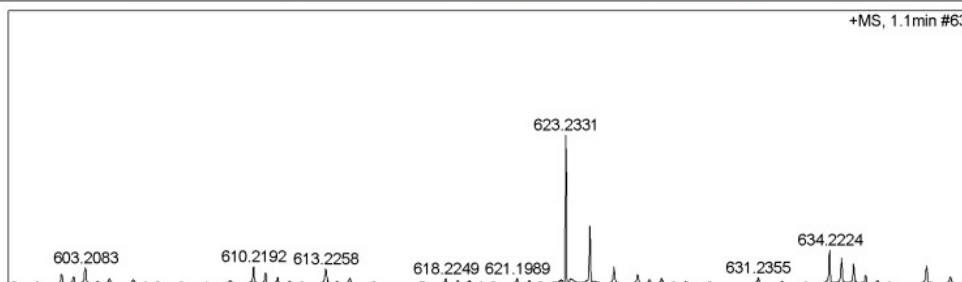

| Meas. #<br>m/z | Formula                                         | m/z      | err<br>[ppm] | Me<br>an<br>err<br>[ppm] | rdb  | N-<br>R<br>ul<br>e | e <sup>-</sup><br>Conf | mSig<br>ma | Std I  | Std<br>Mean<br>m/z | Std I<br>VarNo<br>rm | Std<br>m/z<br>Diff | Std<br>Comb<br>Dev |
|----------------|-------------------------------------------------|----------|--------------|--------------------------|------|--------------------|------------------------|------------|--------|--------------------|----------------------|--------------------|--------------------|
| 623.2331       | C <sub>30</sub> H <sub>39</sub> O <sub>14</sub> | 623.2334 | 0.5          | 1.3                      | 11.5 | ok                 | even                   | 37.10      | 0.0651 | 0.0039             | 0.0262               | 0.0032             | 0.8427             |

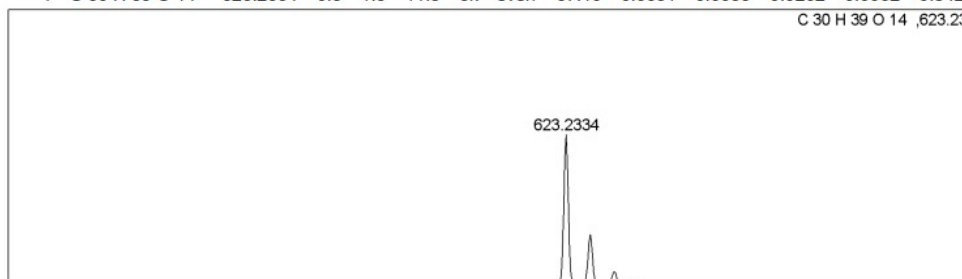

**Figure S48** HRESIMS spectrum of compound **6**

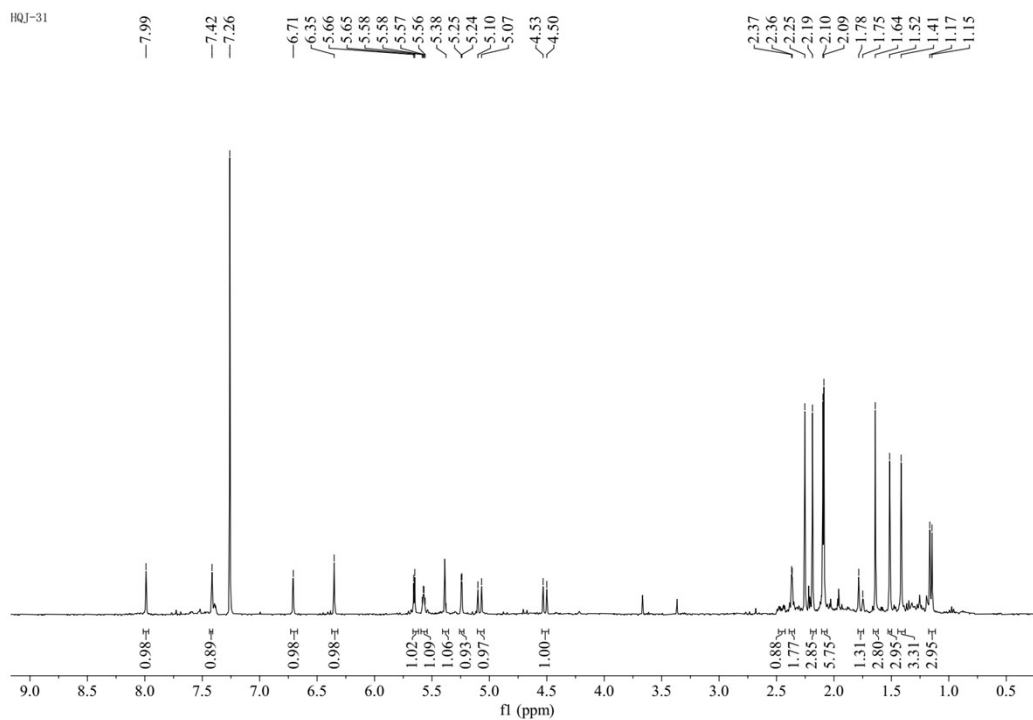

Figure S49  $^1\text{H}$  NMR spectrum (400 MHz,  $\text{CDCl}_3$ ) of compound **6**

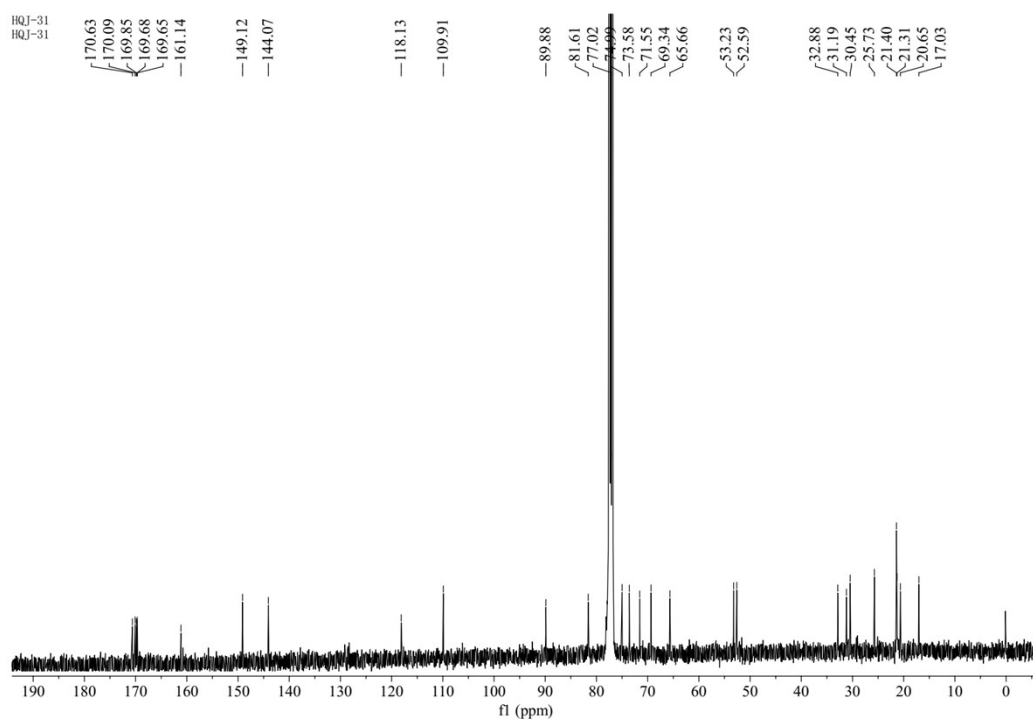

Figure S50  $^{13}\text{C}$  NMR spectrum (100 MHz,  $\text{CDCl}_3$ ) of compound **6**

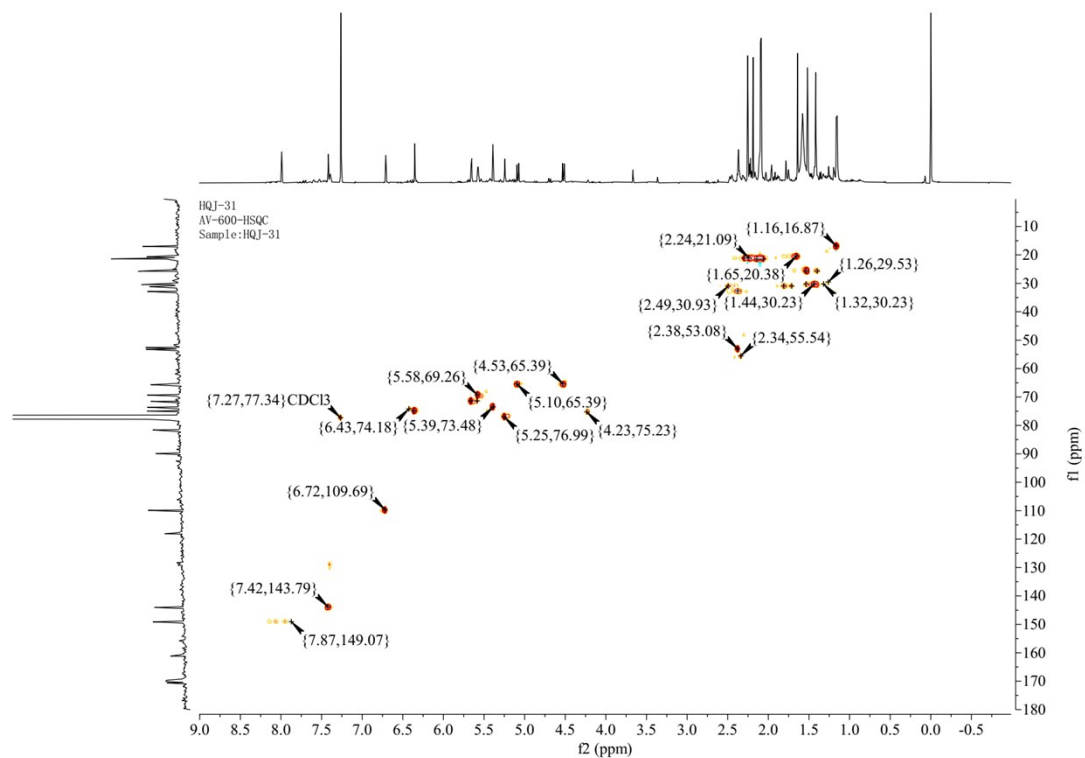

Figure S51 HSQC spectrum (600 MHz, CDCl<sub>3</sub>) of compound 6

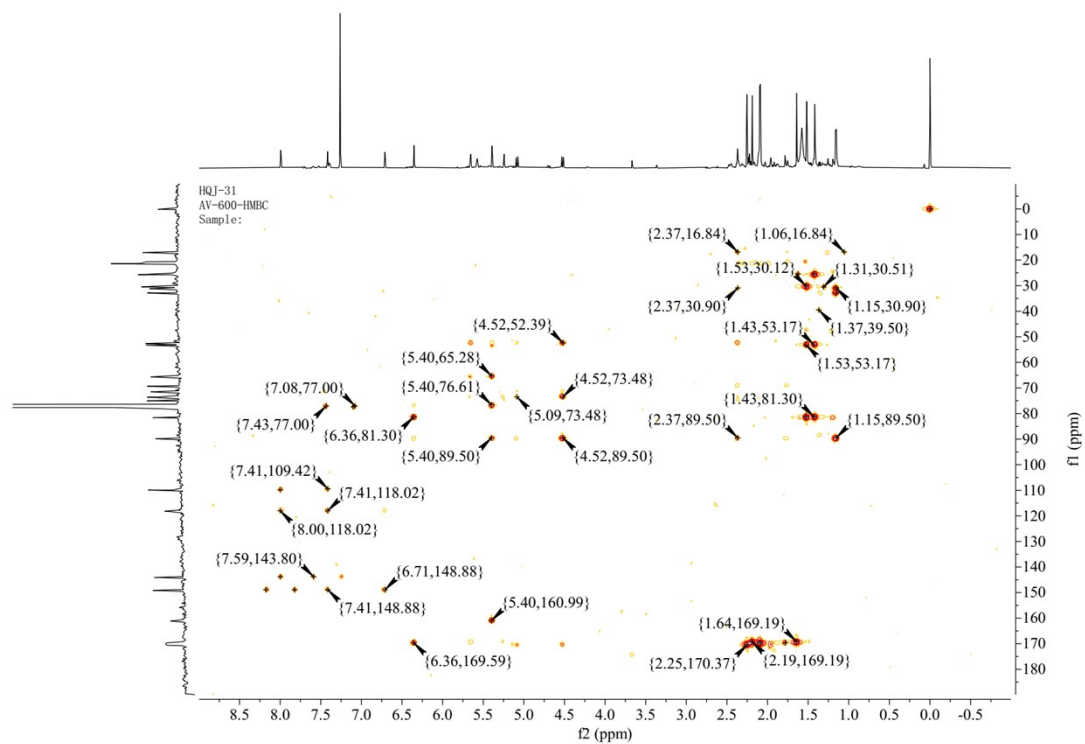

Figure S52 HMBC spectrum (600 MHz, CDCl<sub>3</sub>) of compound 6

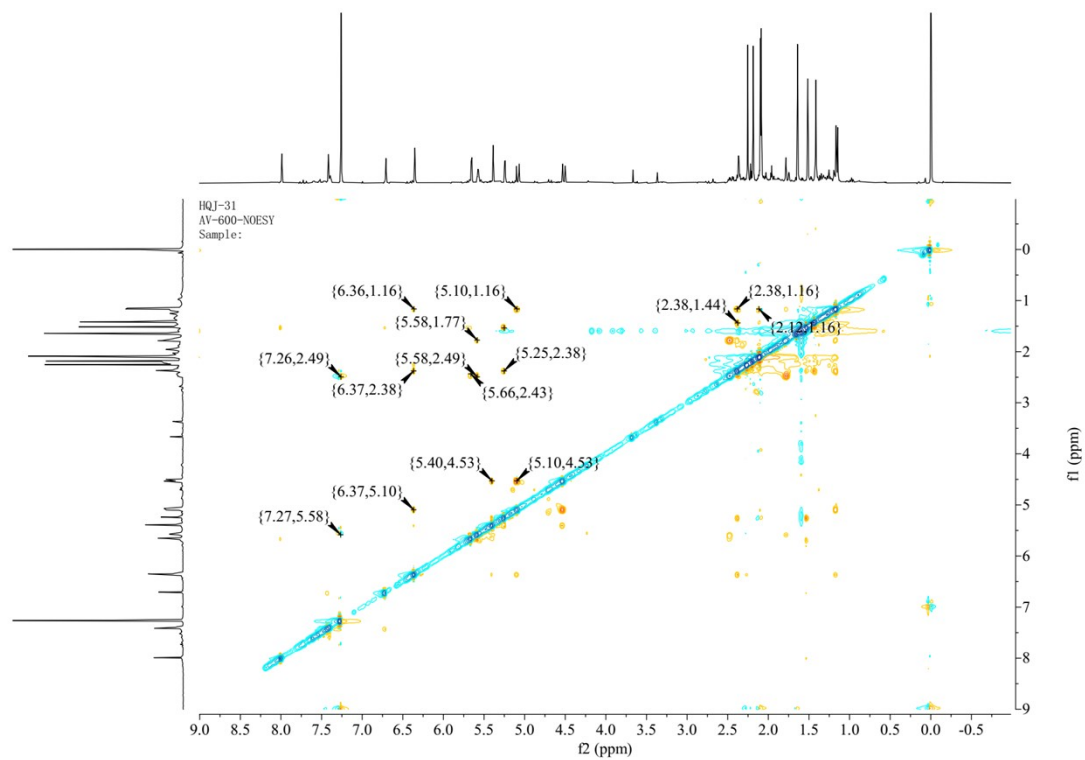

**Figure S53** NOESY spectrum (600 MHz,  $\text{CDCl}_3$ ) of compound **6**

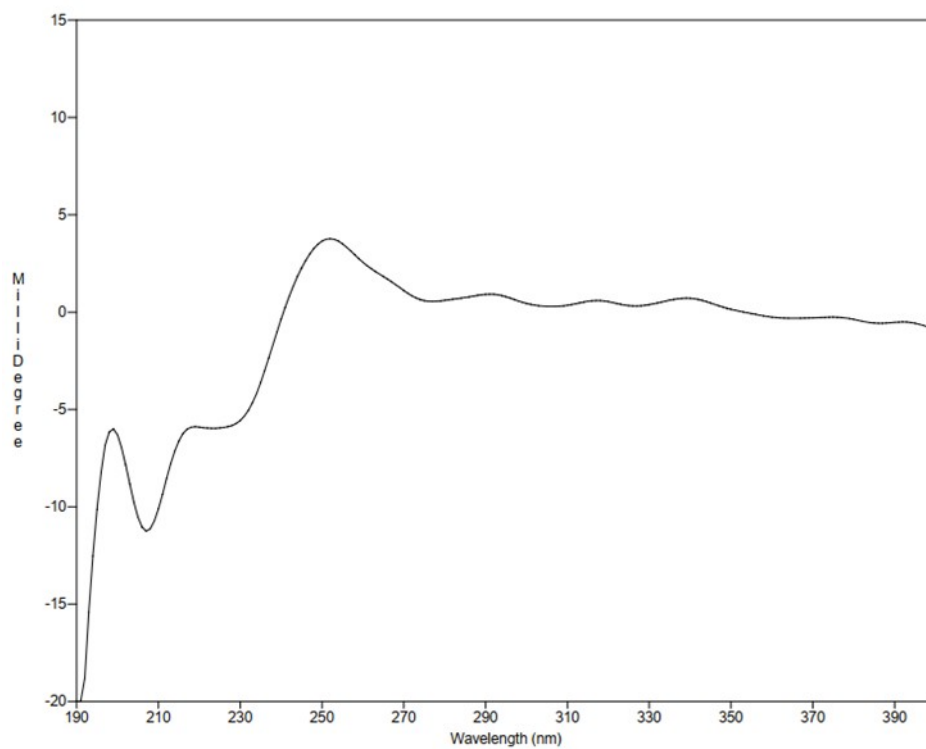

**Figure S54** Experimental ECD spectrum of compound **6**



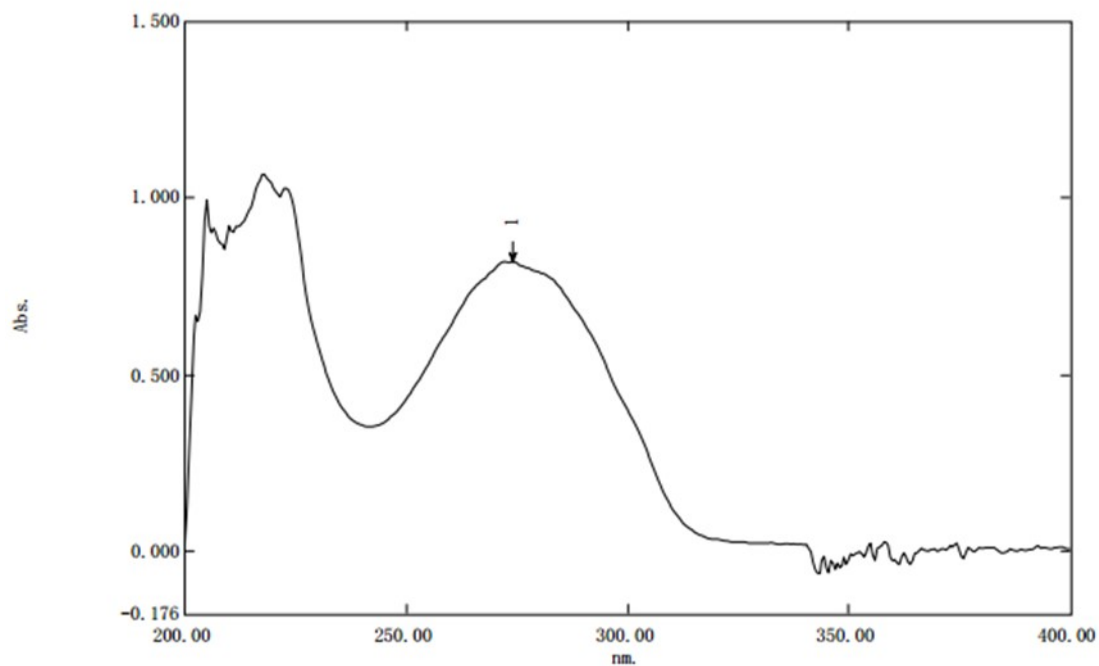

Figure S55 UV spectrum of compound 7

**Acquisition Parameter**

|             |          |                       |           |                  |           |
|-------------|----------|-----------------------|-----------|------------------|-----------|
| Source Type | ESI      | Ion Polarity          | Positive  | Set Nebulizer    | 1.2 Bar   |
| Focus       | Active   | Set Capillary         | 4500 V    | Set Dry Heater   | 180 °C    |
| Scan Begin  | 50 m/z   | Set End Plate Offset  | -500 V    | Set Dry Gas      | 8.0 l/min |
| Scan End    | 1500 m/z | Set Collision Cell RF | 400.0 Vpp | Set Divert Valve | Source    |

**Generate Molecular Formula Parameter**

|                  |                        |         |
|------------------|------------------------|---------|
| Formula, min.    |                        |         |
| Formula, max.    |                        |         |
| Measured m/z     | Tolerance              | Charge  |
| Check Valence    | Minimum                | Maximum |
| Nitrogen Rule    | Electron Configuration |         |
| Filter H/C Ratio | Minimum                | Maximum |
| Estimate Carbon  |                        |         |

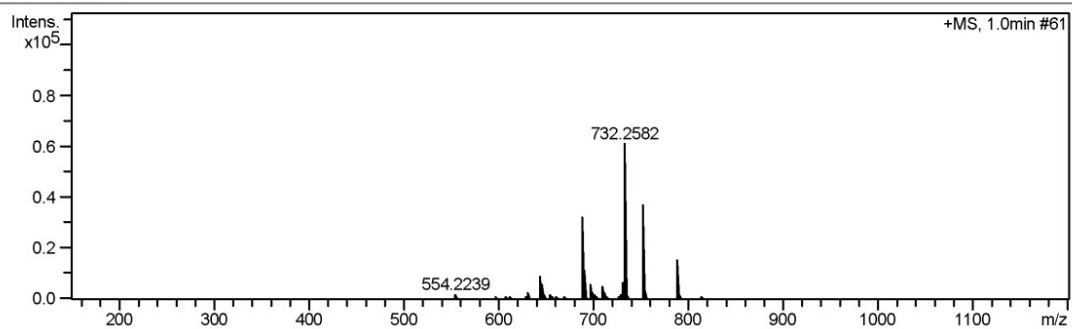

Figure S56 HRESIMS spectrum of compound 7

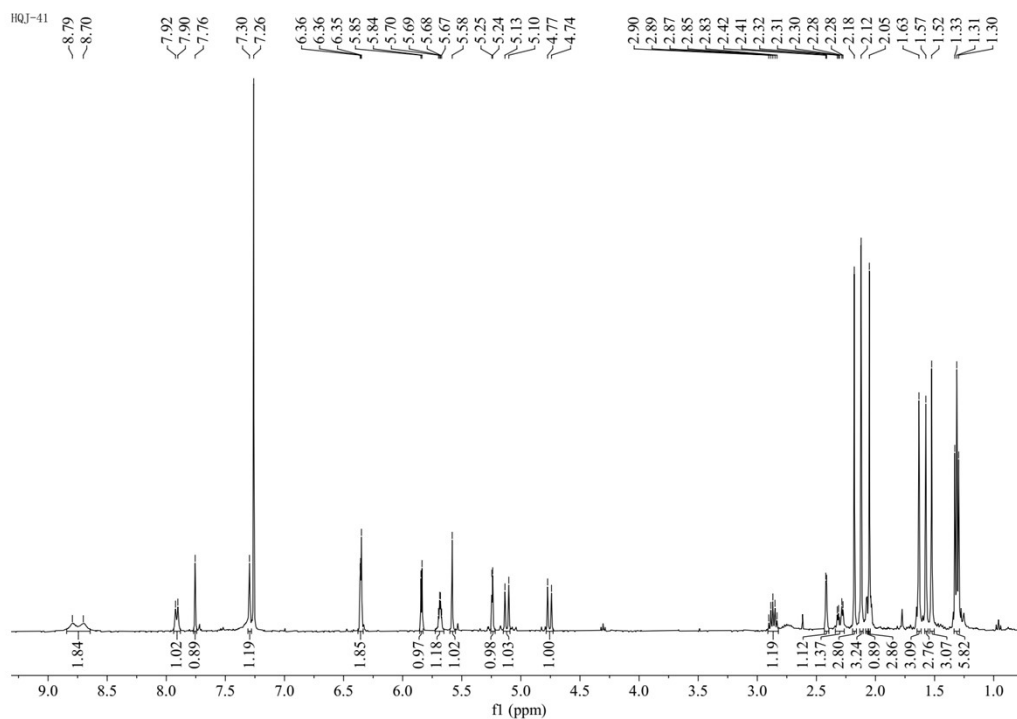

Figure S57  $^1\text{H}$  NMR spectrum (400 MHz,  $\text{CDCl}_3$ ) of compound 7

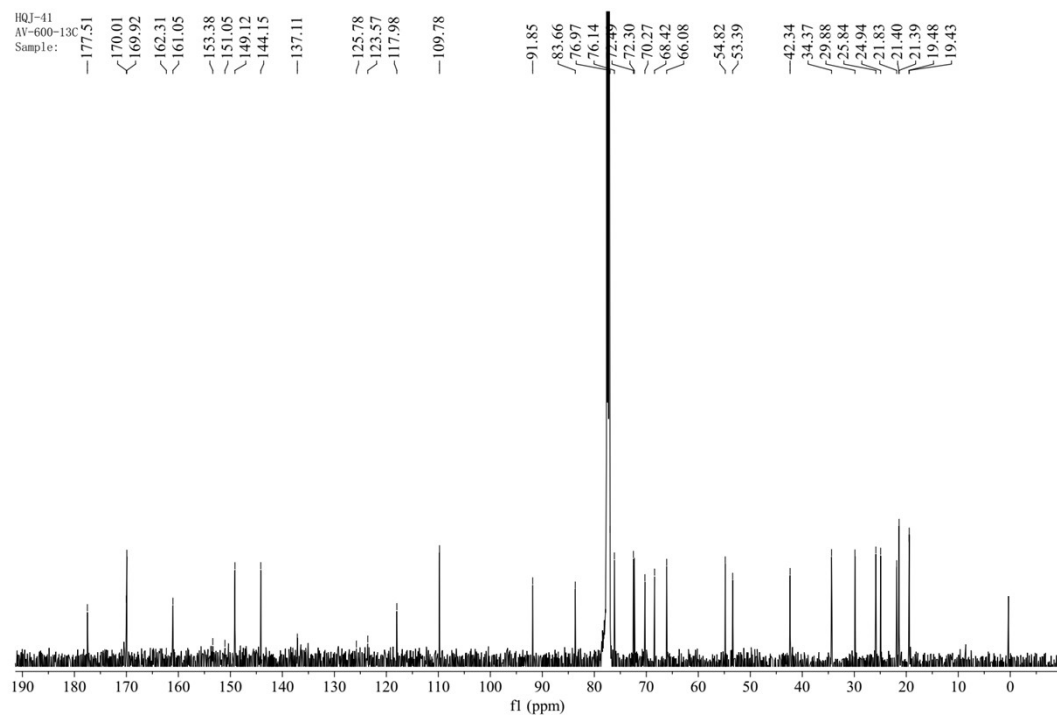

Figure S58  $^{13}\text{C}$  NMR spectrum (100 MHz,  $\text{CDCl}_3$ ) of compound 7

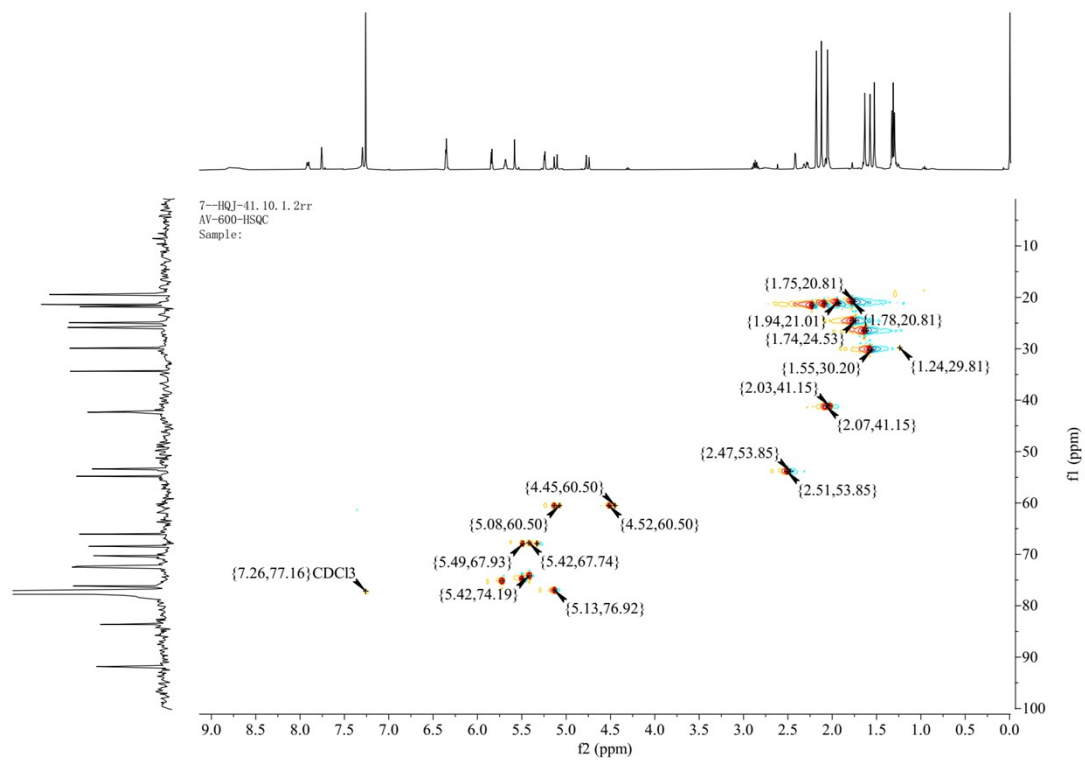

**Figure S59** HSQC spectrum (600 MHz,  $\text{CDCl}_3$ ) of compound **7**

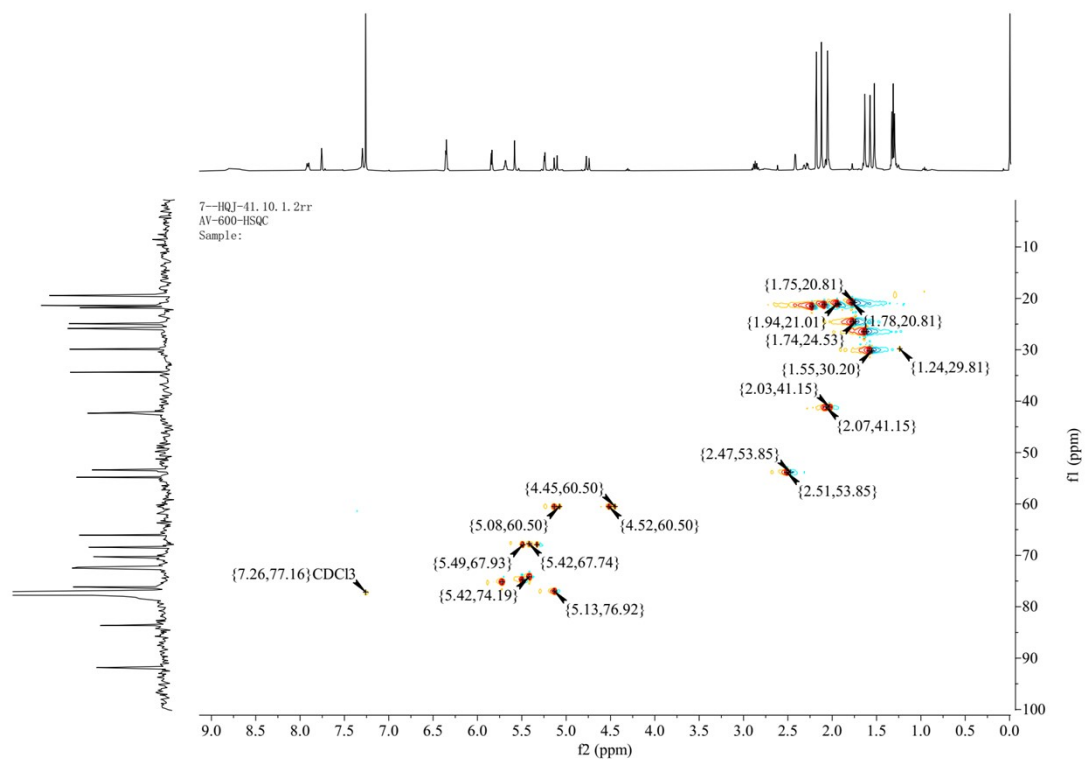

**Figure S60** HMBC spectrum (600 MHz,  $\text{CDCl}_3$ ) of compound **7**

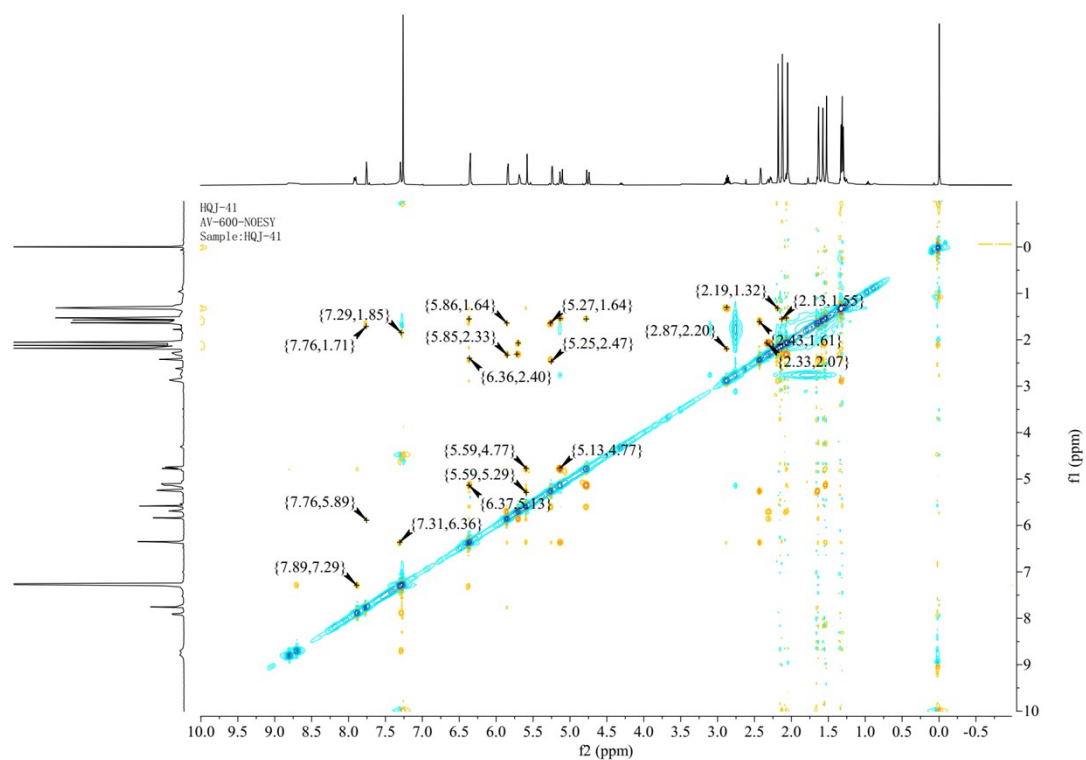

**Figure S61** NOESY spectrum (600 MHz,  $\text{CDCl}_3$ ) of compound **7**

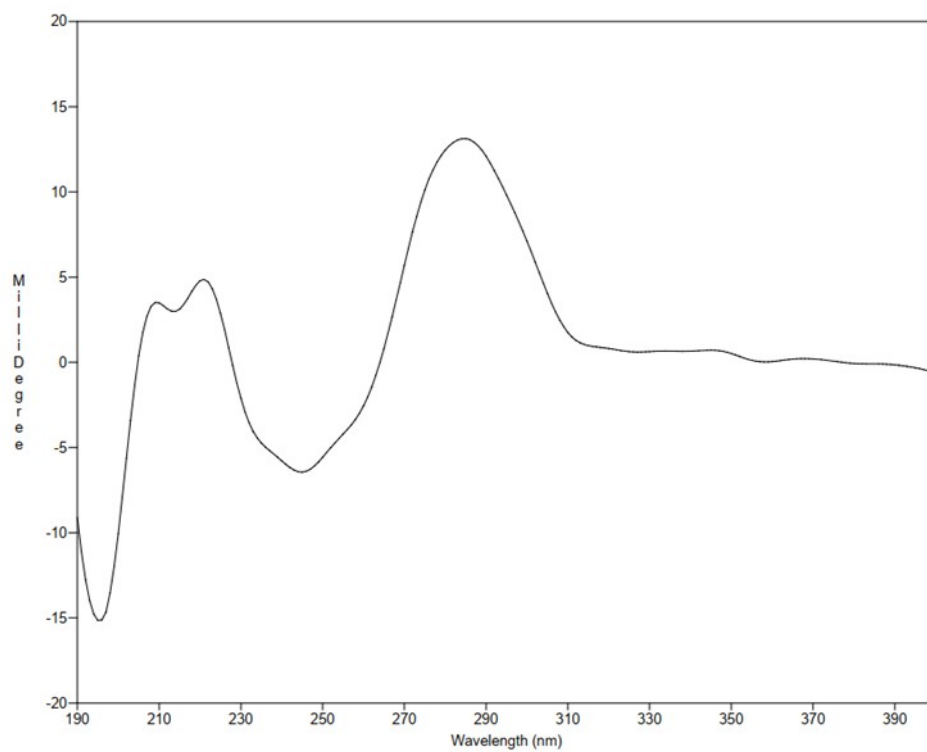

**Figure S62** Experimental ECD spectrum of compound **7**

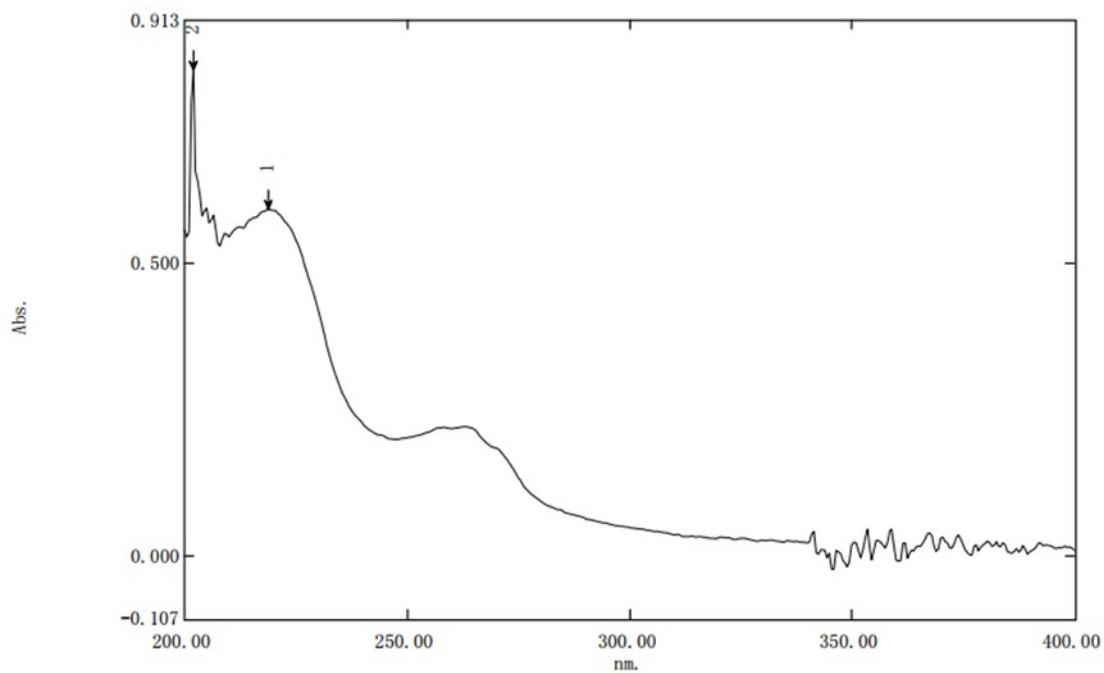

**Figure S63** UV spectrum of compound **8**

**Acquisition Parameter**

|             |          |                       |           |                  |           |
|-------------|----------|-----------------------|-----------|------------------|-----------|
| Source Type | ESI      | Ion Polarity          | Positive  | Set Nebulizer    | 1.2 Bar   |
| Focus       | Active   | Set Capillary         | 4500 V    | Set Dry Heater   | 180 °C    |
| Scan Begin  | 50 m/z   | Set End Plate Offset  | -500 V    | Set Dry Gas      | 8.0 l/min |
| Scan End    | 1500 m/z | Set Collision Cell RF | 400.0 Vpp | Set Divert Valve | Source    |

**Generate Molecular Formula Parameter**

|                  |                        |         |
|------------------|------------------------|---------|
| Formula, min.    |                        |         |
| Formula, max.    |                        |         |
| Measured m/z     | Tolerance              | Charge  |
| Check Valence    | Minimum                | Maximum |
| Nitrogen Rule    | Electron Configuration |         |
| Filter H/C Ratio | Minimum                | Maximum |
| Estimate Carbon  |                        |         |

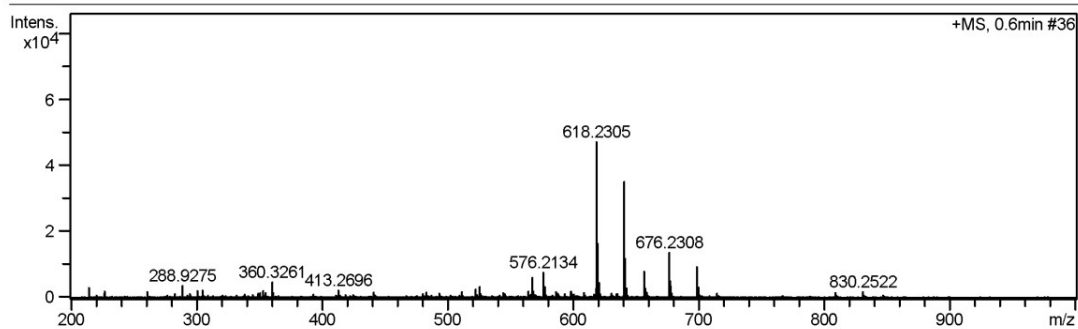

**Figure S64** HRESIMS spectrum of compound **8**

HQJ-12

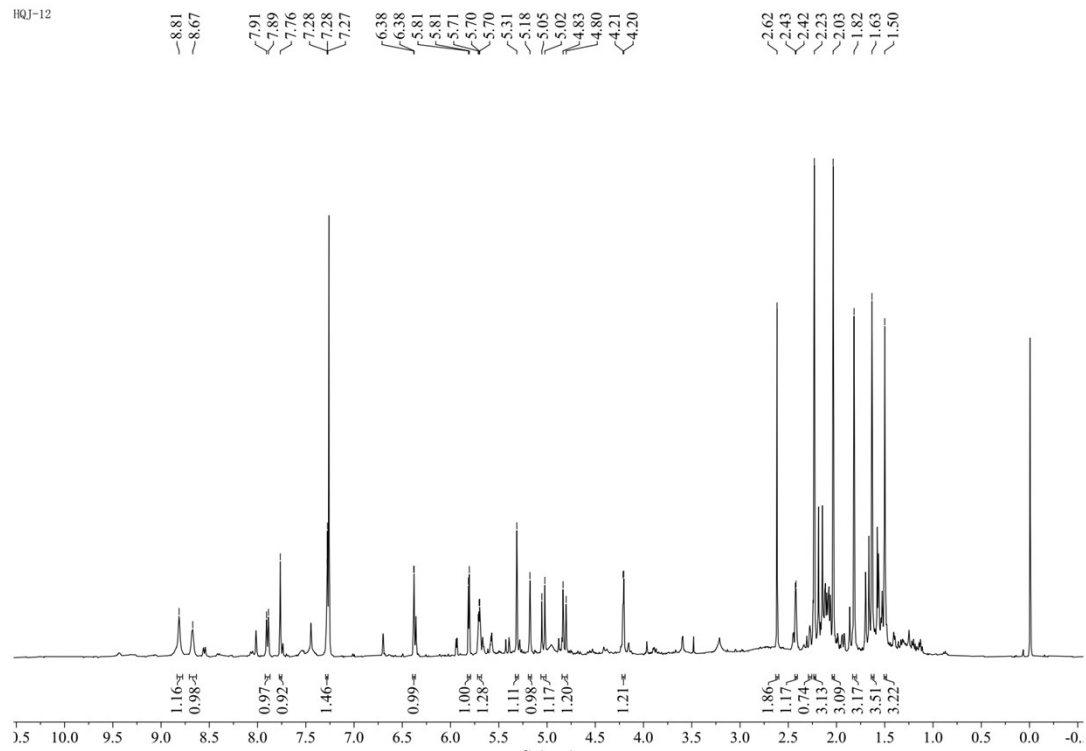

Figure S65 <sup>1</sup>H NMR spectrum (400 MHz, CDCl<sub>3</sub>) of compound 8

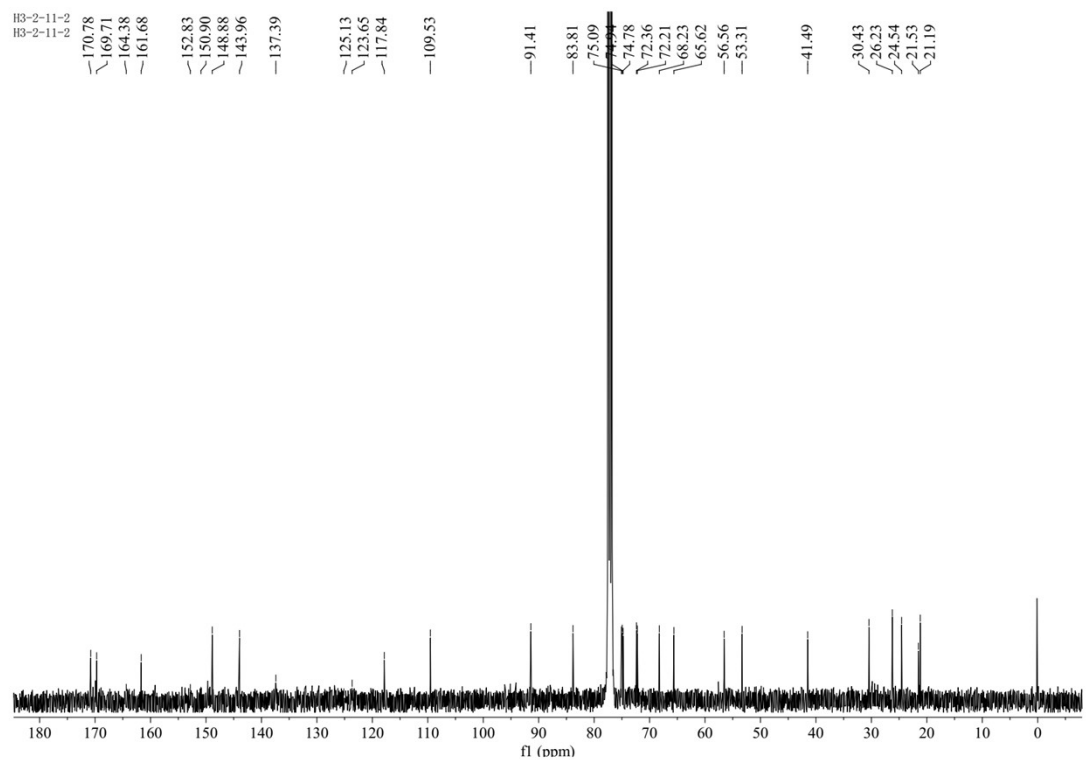

Figure S66 <sup>13</sup>C NMR spectrum (100 MHz, CDCl<sub>3</sub>) of compound 8

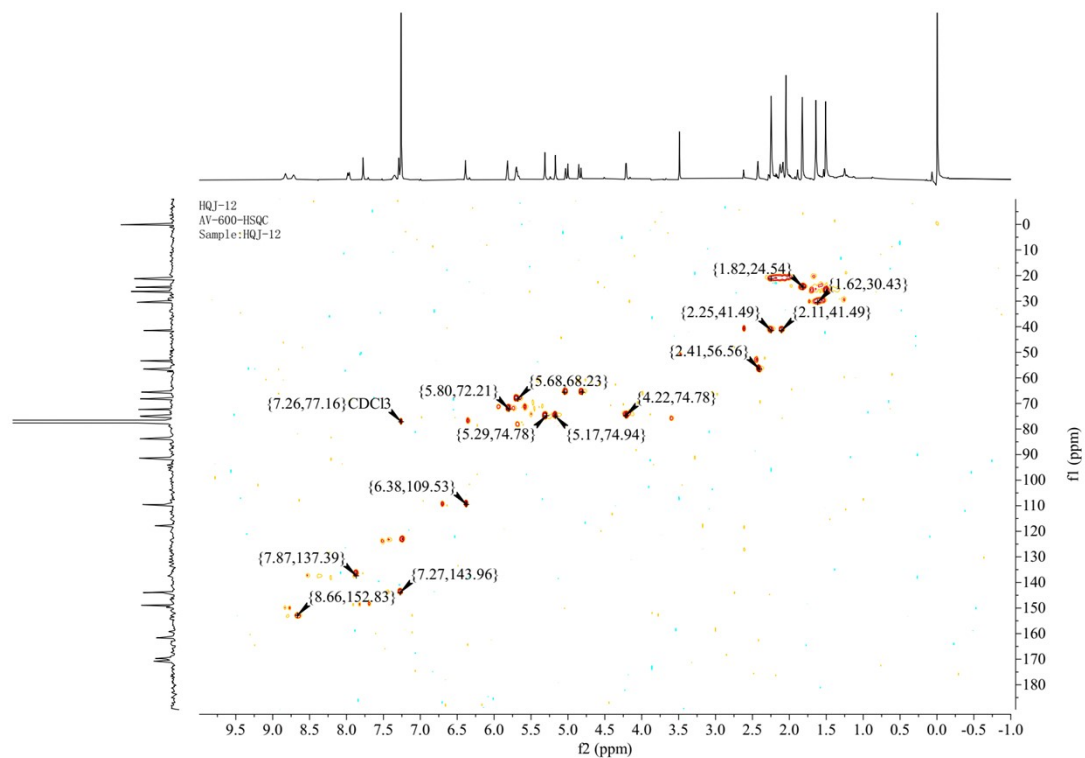

**Figure S67** HSQC spectrum (600 MHz,  $\text{CDCl}_3$ ) of compound **8**

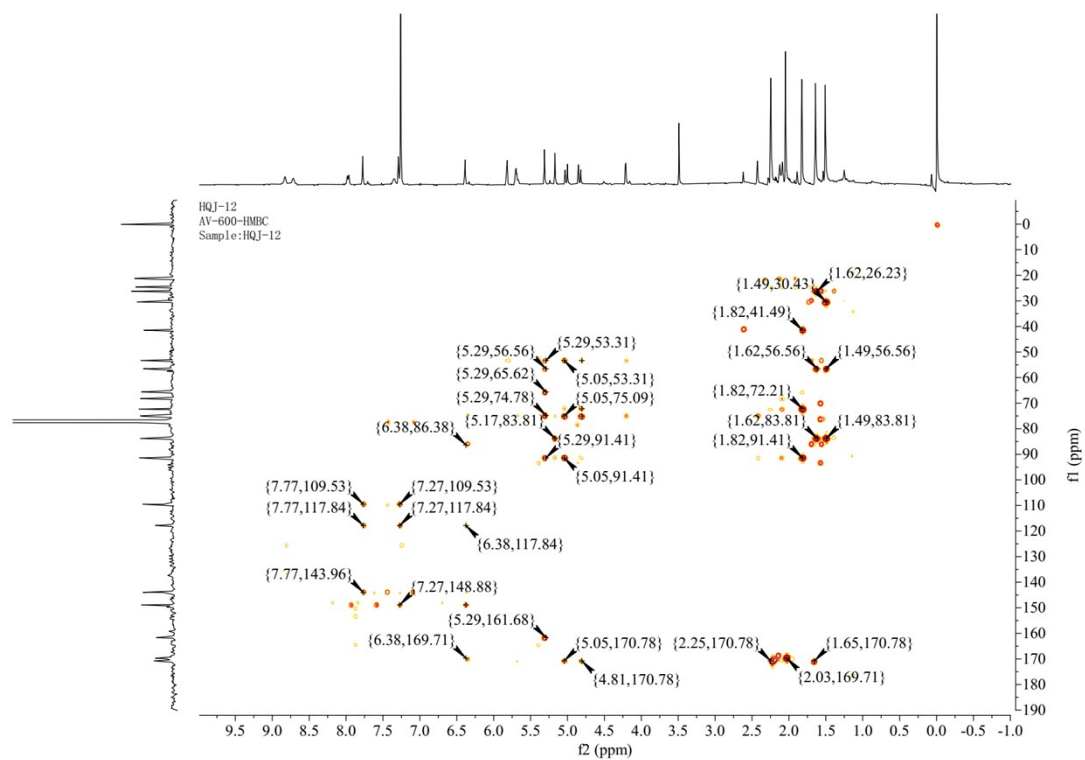

**Figure S68** HMBC spectrum (600 MHz,  $\text{CDCl}_3$ ) of compound **8**

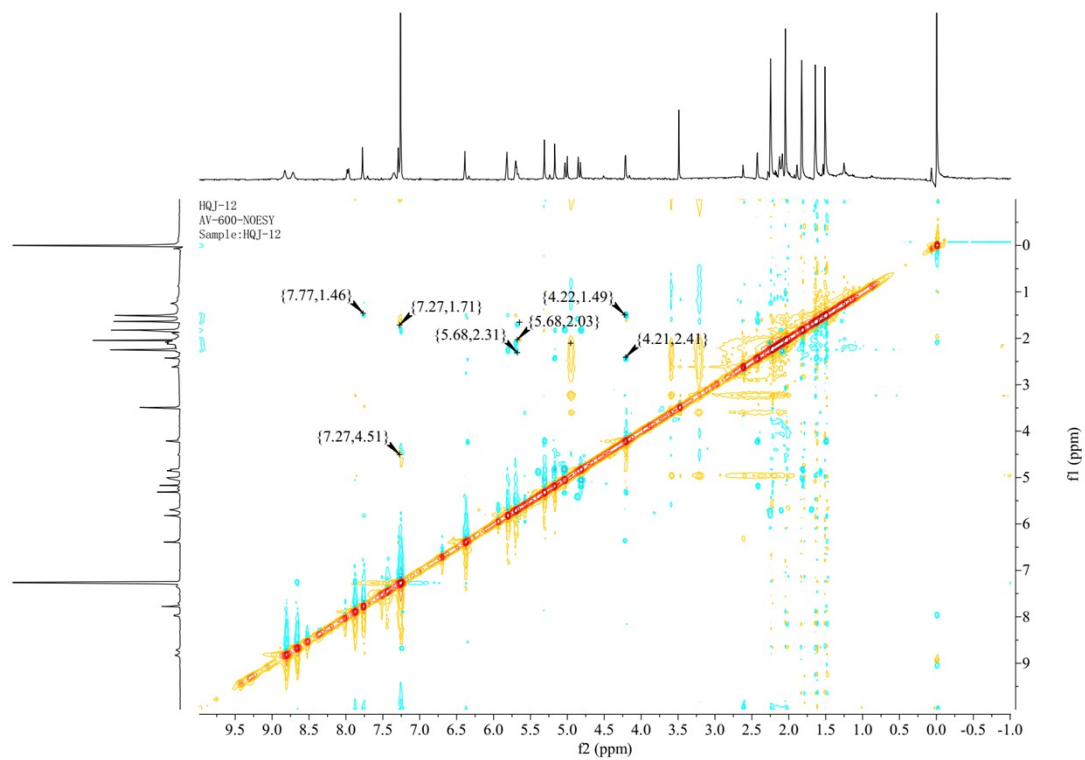

**Figure S69** NOESY spectrum (600 MHz,  $\text{CDCl}_3$ ) of compound **8**

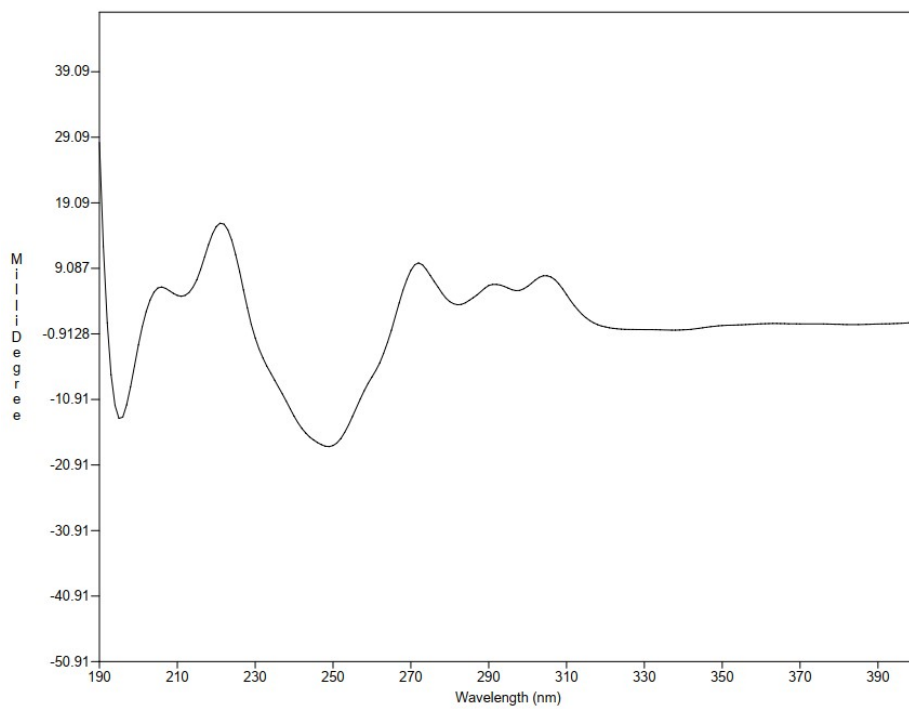

**Figure S70** Experimental ECD spectrum of compound **8**



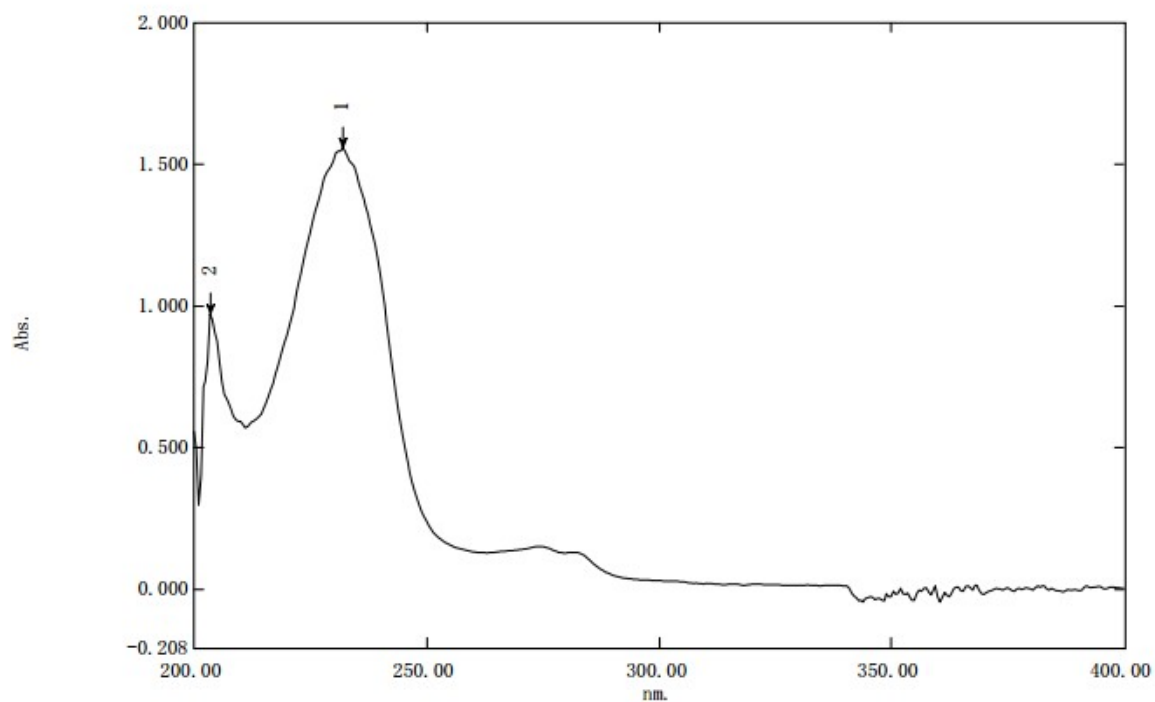

**Figure S71** UV spectrum of compound **9**

| Acquisition Parameter |          |                       |           |                  |           |
|-----------------------|----------|-----------------------|-----------|------------------|-----------|
| Source Type           | ESI      | Ion Polarity          | Positive  | Set Nebulizer    | 1.2 Bar   |
| Focus                 | Active   | Set Capillary         | 4500 V    | Set Dry Heater   | 180 °C    |
| Scan Begin            | 50 m/z   | Set End Plate Offset  | -500 V    | Set Dry Gas      | 8.0 l/min |
| Scan End              | 1500 m/z | Set Collision Cell RF | 400.0 Vpp | Set Divert Valve | Source    |

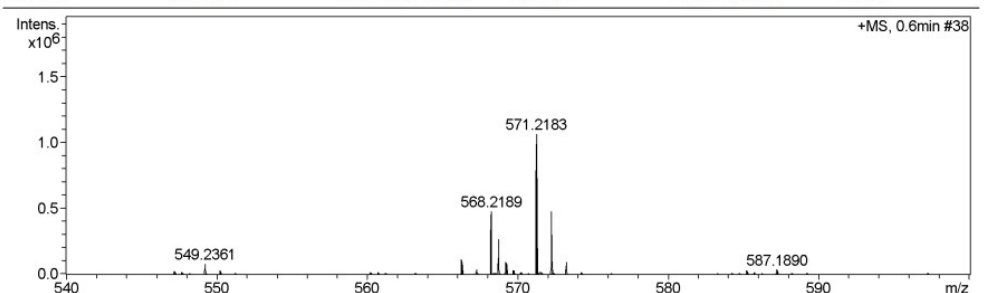

| Meas. # | m/z      | Formula                                           | m/z      | err [ppm] | Mean err [ppm] | rdb  | N-Rule | e <sup>-</sup> Conf | mSigma | Std I  | Std Mean m/z | Std Var | Std I No | Std m/z Diff | Std Comb Dev |
|---------|----------|---------------------------------------------------|----------|-----------|----------------|------|--------|---------------------|--------|--------|--------------|---------|----------|--------------|--------------|
| 1       | 571.2183 | C <sub>28</sub> H <sub>36</sub> NaO <sub>11</sub> | 571.2150 | -5.9      | -8.5           | 10.5 | ok     | even                | 67.14  | 0.0956 | 0.0056       | 0.0303  | 0.0054   | 0.8427       |              |

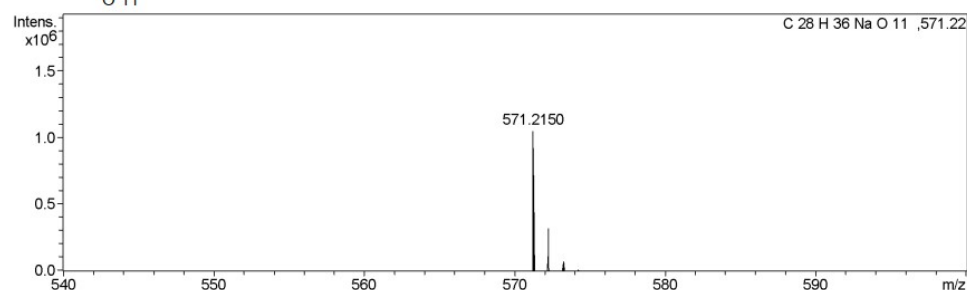

**Figure S72** HRESIMS spectrum of compound **9**

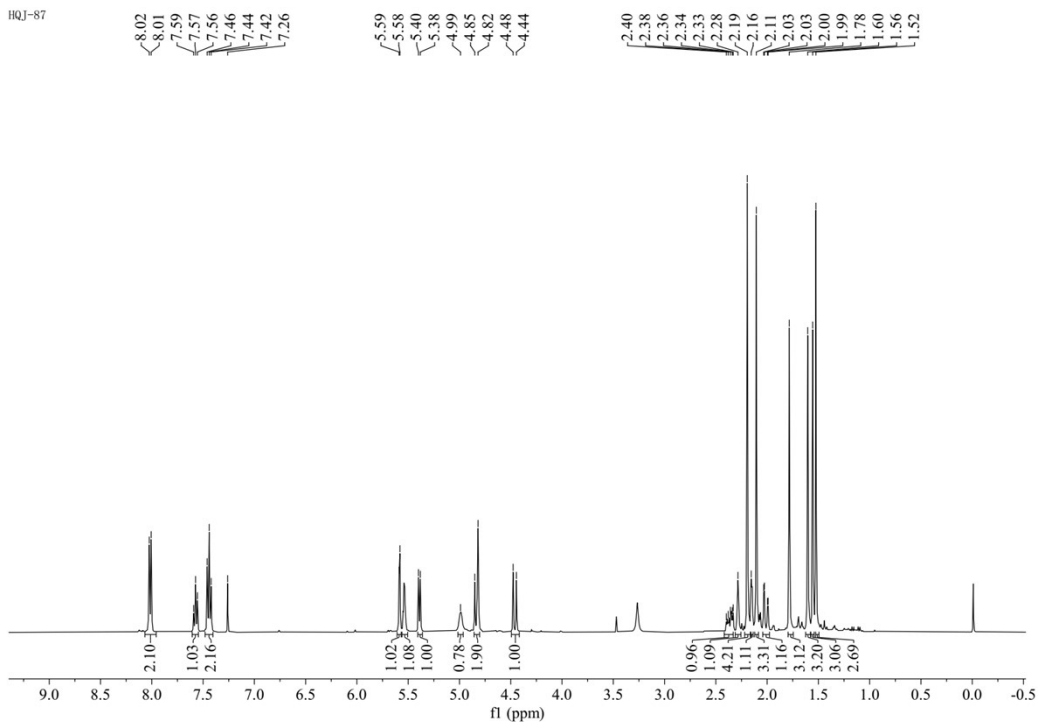

**Figure S73**  $^1\text{H}$  NMR spectrum (400 MHz,  $\text{CDCl}_3$ ) of compound **9**

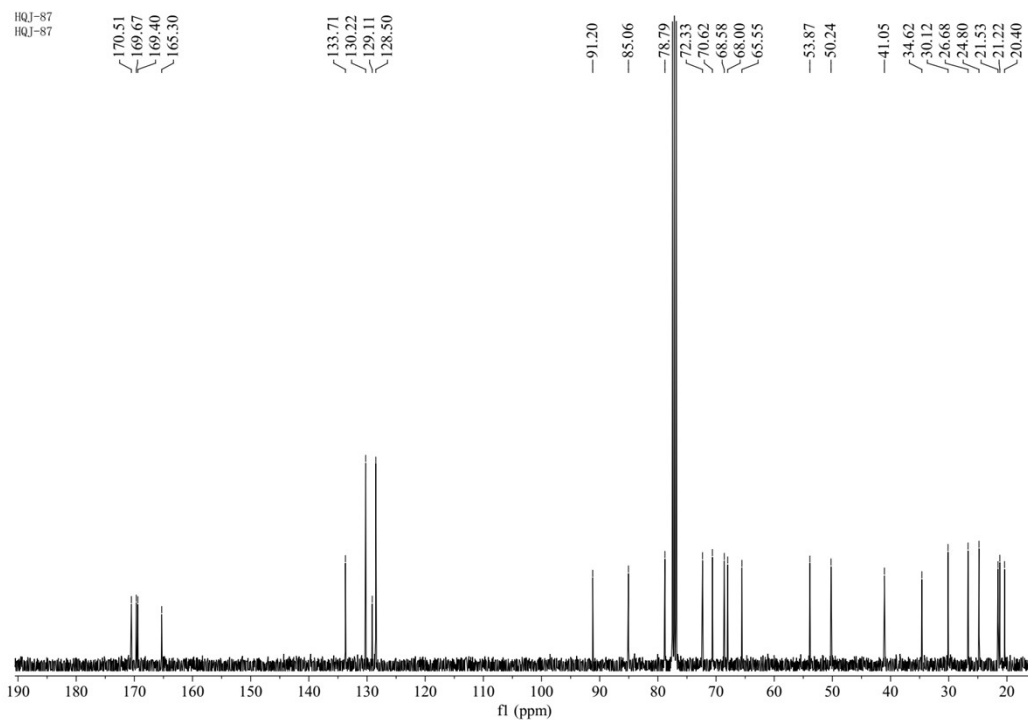

**Figure S74**  $^{13}\text{C}$  NMR spectrum (100 MHz,  $\text{CDCl}_3$ ) of compound **9**

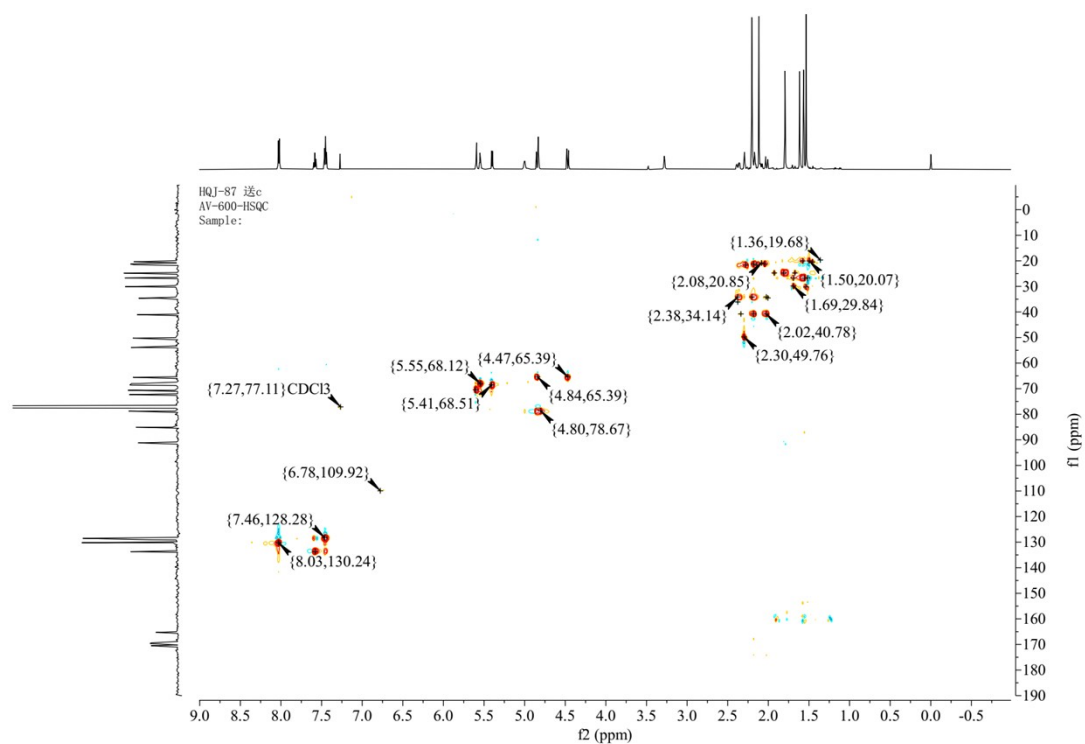

Figure S75 HSQC spectrum (600 MHz,  $\text{CDCl}_3$ ) of compound **9**

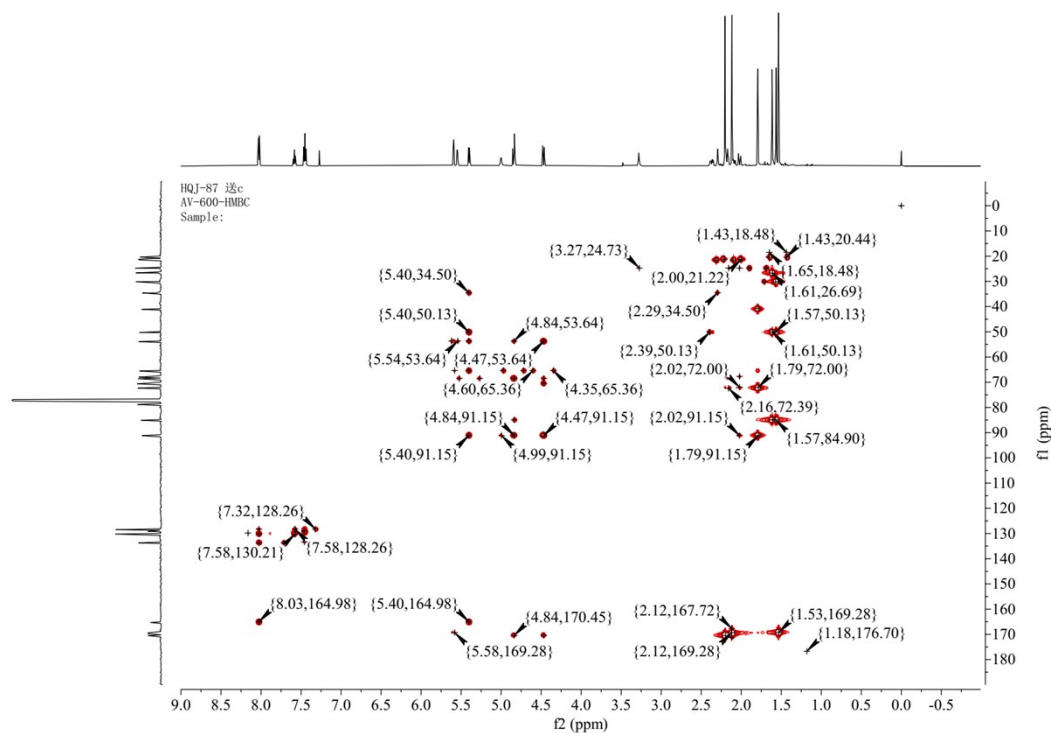

Figure S76 HMBC spectrum (600 MHz,  $\text{CDCl}_3$ ) of compound **9**

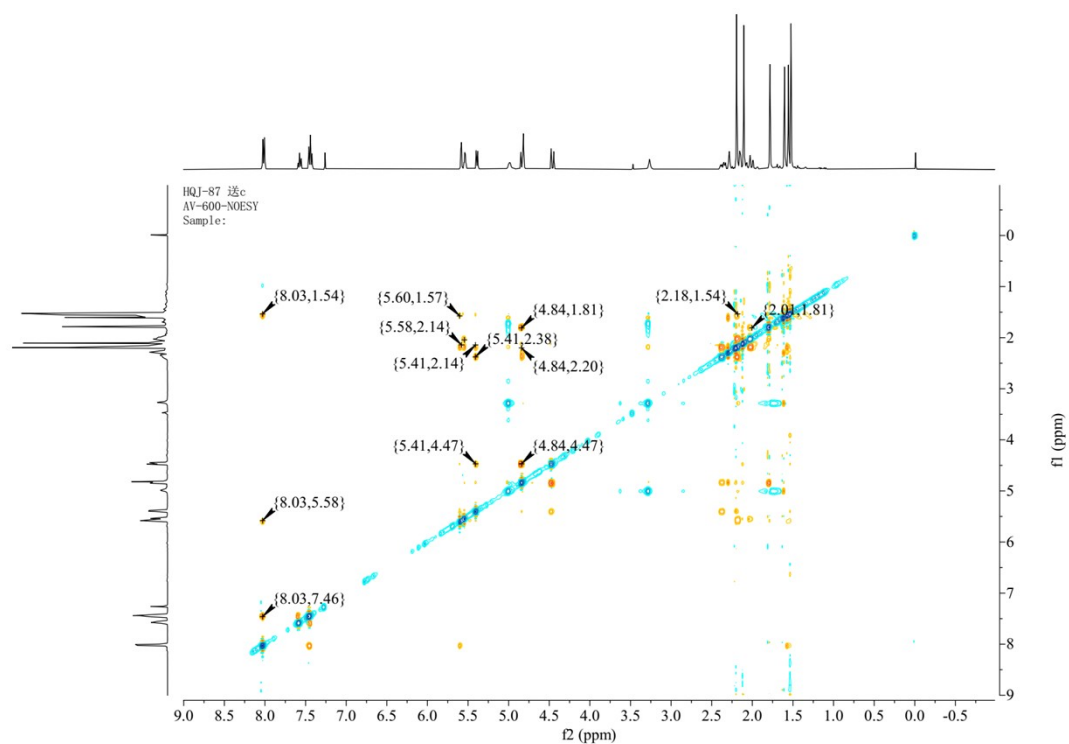

**Figure S77** NOESY spectrum (600 MHz,  $\text{CDCl}_3$ ) of compound **9**

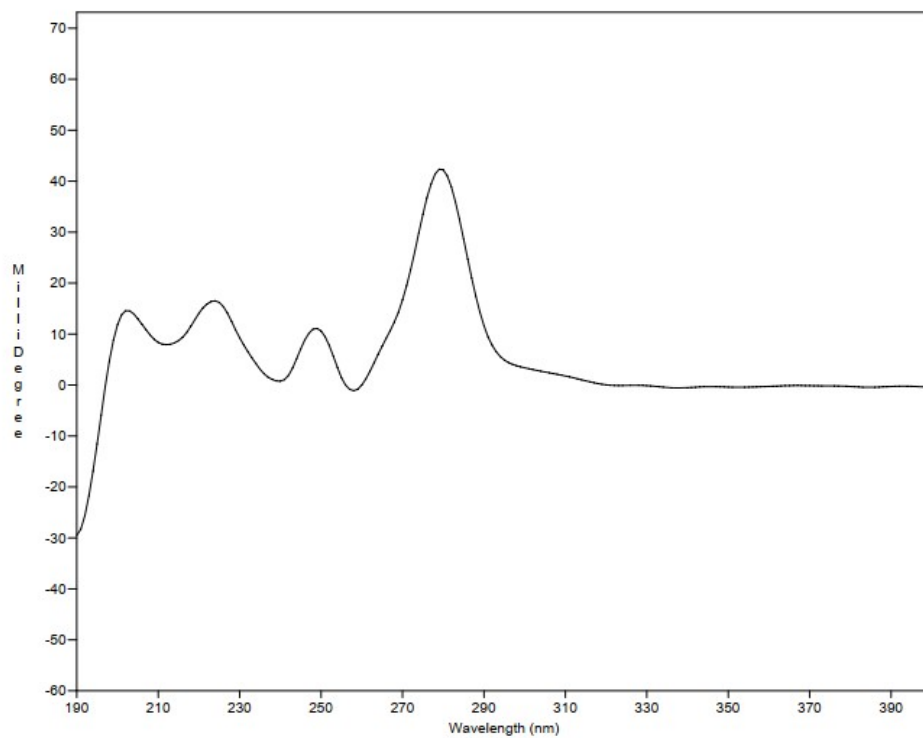

**Figure S78** Experimental ECD spectrum of compound **9**
